# Supplementary material for: Engineered ACE2 receptor traps potently neutralize SARS-CoV-2
Source: bioRxiv or medRxiv preprint supplement (doi:10.1101/2020.07.31.231746), 2020-08-04
Supplement: Supplementary file [file media-2.pdf]

Appendix 1: Sequences of ACE2 mutants in this work

|     |                                                                                                                                                                                                                                                                                                                                                                                                                                                                                                                                                                                                                                                                                                                                                                                                                                                                                                                                                                                                                                                                                                                                                                                                                                                                                                                                                                                                                                                                                                                                                                                                                                                                                                                                                                                                                                                                                                                                                                                                                                    |
|-----|------------------------------------------------------------------------------------------------------------------------------------------------------------------------------------------------------------------------------------------------------------------------------------------------------------------------------------------------------------------------------------------------------------------------------------------------------------------------------------------------------------------------------------------------------------------------------------------------------------------------------------------------------------------------------------------------------------------------------------------------------------------------------------------------------------------------------------------------------------------------------------------------------------------------------------------------------------------------------------------------------------------------------------------------------------------------------------------------------------------------------------------------------------------------------------------------------------------------------------------------------------------------------------------------------------------------------------------------------------------------------------------------------------------------------------------------------------------------------------------------------------------------------------------------------------------------------------------------------------------------------------------------------------------------------------------------------------------------------------------------------------------------------------------------------------------------------------------------------------------------------------------------------------------------------------------------------------------------------------------------------------------------------------|
| 13  | <p>CAATCTACCATCGAAGAGCAGGCCAAAACATTCTCGACAAGTTTAATCACGAGGCTGAAGACC<br/> TTTTCTACCAATCAAGTCTGGCTAGCTGGAATTACAATACAAACATTACAGAGGAGAACGTACA<br/> AAACATGAATAACGCAGGGGACAAGTGGAGCGCATTCTTAAGGAACAAAGTACCCTTGCGCAA<br/> ATGTATCCGCTGCAAGAGATTCAAACCTGACGGTTAAGCTGCAACTTCAGGCCCTCCAACAAA<br/> ATGGAAGTTCAGTCTTGTCAGAAGACAAAAGCAAGCGACTGAACACCATCCTTAACACCATGTC<br/> AACCATATATTCAACAGGTAAAGTTTGCAATCCGGATAACCCCAAGAATGTTTGCTTCTTGAA<br/> CCCGGTCTCAACGAAATTATGGCCAACAGTCTTGATTACAACGAGCGATTGTGGGCATGGGAAA<br/> GTTGGAGGAGTGAGGTAGGCAAACAGTTGAGACCTCTTTATGAAGAGTACGTTGTCCTTAAAAA<br/> TGAAATGGCTCGCGCGAATCATTATGAAGACTATGGTGACTACTGGAGGGGGGATTATGAGGTG<br/> AACGGGGTGGACGGATACGATTACTCTAGGGGCCAGCTGATAGAGGATGTCGAGCACACCTTTG<br/> AGGAGATTAAGCCGTTGTACGAACATTTGCACGCCTATGTCAGGGCTAAGCTCATGAACGCTTA<br/> TCCGAGTTATATCTCCCCGATAGGATGCTTGCCTGCTCACTTGTTGGGCGATATGTGGGGACGC<br/> TTTTGGACCAACTTGATTCCCTTACGGTACCGTTCGGCCAGAAACCAAATATCGACGTGACAG<br/> ACGCAATGGTGGATCAAGCATGGGATGCGCAACGAATCTTCAAGGAGGCAGAAAAATTTTTTCGT<br/> TTCAGTTGGACTCCCAAACATGACGCAGGGTTTCTGGGAGAACTCAATGTTGACAGATCCAGGT<br/> AATGTGCAGAAAGCGGTTTGCCACCCTACTGCATGGGATCTTGGTAAAGGGGACTTCCGCATAC<br/> TCATGTGTACGAAAGTAACTATGGACGACTTTCTTACTGCGCACCACGAGATGGGGCACATACA<br/> ATACGATATGGCGTACGCAGCTCAACCTTTCCTTCTGCGGAACGGGGCGAATGAAGGATTTAC<br/> GAGGCAGTGGGTGAGATTATGTCCCTGTCAGCTGCCACTCCGAAACATCTGAAAAGCATCGGCC<br/> TGTTGAGCCCAGACTTCCAAGAAGATAATGAGACCGAAATAAECTTCTTCTGAAGCAAGCACT<br/> GACTATTGTAGGTACCTTGCCCTTTACCTACATGCTGGAGAAGTGGAGGTGGATGGTATTTAAG<br/> GGGGAGATACCGAAAGATCAATGGATGAAAAAGTGGTGGGAAATGAAAAGGGAGATCGTTGGCG<br/> TAGTTGAACCAGTACCGCATGATGAGACGTACTGCGATCCGGCTAGTCTGTTCCATGTCTCTAA<br/> TGATTACTCTTTCATCCGCTACTACCCCGCACGCTGTATCAATTCCAGTTCCAAGAAGCTCTC<br/> TGTCAGGCTGCCAAGCACGAAGGACCGCTGCACAAATGCGACATTAGCAATTCTACAGAGGCGG<br/> GTCAGAAGTTGTTCAATATGCTTAGACTGGGGAAGAGCGAACCGTGGACGCTCGCTTTGGAGAA<br/> CGTTGTTGGAGCTAAGAATATGAACGTCAGGCCCTTGCTGAATTACTTTGAACCTCTGTTTACG<br/> TGGTTGAAAGACCAAAAATAAAAACCTCTTTGTTGGGTGGAGTACTGACTGGTCCCCCTATGCC</p> |
| 208 | <p>CAATCTACCATCGAAGAGCAGGCCAAAACATTCTCGACAAGTTTAATCACGAGGCTGAAGACC<br/> TTTTCTACCAATCAAGTCTGGCTAGCTGGAATTACAATACAAACATTACAGAGGAGAACGTACA<br/> AAACATGAATAACGCAGGGGACAAGTGGAGCGCATTCTTAAGGAACAAAGTACCCTTGCGCAA<br/> ATGTATCCGCTGCAAGAGATTCAAACCTGACGGTTAAGCTGCAACTTCAGGCCCTCCAACAAA<br/> ATGGAAGTTCAGTCTTGTCAGAAGACAAAAGCAAGCGACTGAACACCATCCTTAACACCATGTC<br/> AACCATATATTCAACAGGTAAAGTTTGCAATCCGGATAACCCCAAGAATGTTTGCTTCTTGAA<br/> CCCGGTCTCAACGAAATTATGGCCAACAGTCTTGATTACAACGAGCGATTGTGGGCATGGGAAA<br/> GTTGGAGGAGTGAGGTAGGCAAACAGTTGAGACCTCTTTATGAAGAGTACGTTGTCCTTAAAAA<br/> TGAAATGGCTCGCGCGAATCATTATGAAGACTATGGTGACTACTGGAGGGGGGATTATGAGGTG<br/> AACGGGGTGGACGGATACGATTACTCTAGGGGCCAGCTGATAGAGGATGTCGAGCACACCTTTG<br/> AGGAGATTAAGCCGTTGTACGAACATTTGCACGCCTATGTCAGGGCTAAGCTCATGAACGCTTA<br/> TCCGAGTTATATCTCCCCGATAGGATGCTTGCCTGCTCACTTGTTGGGCGATATGTGGGGACGC<br/> TTTTGGACCAACTTGATTCCCTTACGGTACCGTTCGGCCAGAAACCAAATATCGACGTGACAG<br/> ACGCAATGGTGGATCAAGCATGGGATGCGCAACGAATCTTCAAGGAGGCAGAAAAATTTTTTCGT<br/> TTCAGTTGGACTCCCAAACATGACGCAGGGTTTCTGGGAGAACTCAATGTTGACAGATCCAGGT<br/> AATGTGCAGAAAGCGGTTTGCCACCCTACTGCATGGGATCTTGGTAAAGGGGACTTCCGCATAC<br/> TCATGTGTACGAAAGTAACTATGGACGACTTTCTTACTGCGCACCACGAGATGGGGCACATACA<br/> ATACGATATGGCGTACGCAGCTCAACCTTTCCTTCTGCGGAACGGGGCGAATGAAGGATTTAC</p>                                                                                                                                                                                                                                                                                                                                                                                                                                                                                                                                                                                                                                                                                                                           |

|      |                                                                                                                                                                                                                                                                                                                                                                                                                                                                                                                                                                                                                                                                                                                                                                                                                                                                                                                                                                                                                                                                                                                                                                                                                                                                                                                                                                                                                                                                                                                                                                                                                                                                                                                                                                                                                                                                                                                                                                                                                              |
|------|------------------------------------------------------------------------------------------------------------------------------------------------------------------------------------------------------------------------------------------------------------------------------------------------------------------------------------------------------------------------------------------------------------------------------------------------------------------------------------------------------------------------------------------------------------------------------------------------------------------------------------------------------------------------------------------------------------------------------------------------------------------------------------------------------------------------------------------------------------------------------------------------------------------------------------------------------------------------------------------------------------------------------------------------------------------------------------------------------------------------------------------------------------------------------------------------------------------------------------------------------------------------------------------------------------------------------------------------------------------------------------------------------------------------------------------------------------------------------------------------------------------------------------------------------------------------------------------------------------------------------------------------------------------------------------------------------------------------------------------------------------------------------------------------------------------------------------------------------------------------------------------------------------------------------------------------------------------------------------------------------------------------------|
|      | <p>GAGGCAGTGGGTGAGATTATGTCCCTGTCAGCTGCCACTCCGAAACATCTGAAAAGCATCGGCC<br/> TGTTGAGCCCAGACTTCCAAGAAGATAATGAGACCGAAATAAACTTCCTTCTGAAGCAAGCACT<br/> GACTATTGTAGGTACCTTGCCCTTTACATACATGCTGGAGAAGTGGAGGTGGATGGTATTTAAG<br/> GGGAGATACCGAAAGATCAATGGATGAAAAAGTGGTGGGAAATGAAAAGGGAGATCGTTGGCG<br/> TAGTTGAACCAGTACCGCATGATGAGACGTACTGCGATCCGGCTAGTCTGTTCCATGTCTCTAA<br/> TGATTACTCTTTCATCCGCTACTACACCCGCACGCTGTATCAATTCCAGTTCGAAGAAGCTCTC<br/> TGTCAGGCTGCCAAGCACGAAGGACCGCTGCACAAATGCGACATTAGCAATTCTACAGAGGCGG<br/> GTCAGAAGTTGTTCAATATGCTTAGACTGGGAAGAGCGAACCCTGGACGCTCGCTTTGGAGAA<br/> CGTTGTTGGAGCTAAGAATATGAACGTCAGGCCCTTGTGAATTACTTTGAACCTCTGTTTACG<br/> TGGTTGAAAGACCAAAATAAAAACCTCCTTTGTTGGGTGGAGTACTGACTGGTCCCCCTATGCGG<br/> ACCAAAGCATCAAAGTGAGGATAAGCCTAAAATCAGCTCTTGGAGATAAAGCATATGAATGGAA<br/> CGACAATGAAATGTACCTGTTCCGATCATCTGTTGCATATGCTATGAGGCAGTACTTTTTAAAA<br/> GTA AAAAATCAGATGATTCTTTTTGGGGAGGAGGATGTGCGAGTGGCTAATTTGAAACCAAGAA<br/> TCTCCTTTAATTTCTTTGTCACTGCACCTAAAATGTGTCTGATATCATTCTAGAACTGAAGT<br/> TGAAAAGGCCATCAGGATGTCCCGGAGCCGTATCAATGATGCTTTCCTGTGAATGACAACAGC<br/> CTAGAGTTTCTGGGGATACAGCCAACACTTGGACCTCCTAACCAGCCCCCTGTTTCC</p>                                                                                                                                                                                                                                                                                                                                                                                                                                                                                                                                                                                                                                                                                                                                                                                                                                                                       |
| Y208 | <p>CAATCTACCATCGAAGAGCAGGCCAAAACATTCCTCGACAAGTTTAATCACGAGGCTGAAGACC<br/> TTTTCTACCAATCAAGTCTGGCTAGCTGGAATTACAATACAAACATTACAGAGGAGAACGTACA<br/> AAACATGAATAACGCAGGGGACAAGTGGAGCGCATTCTTAAGGAACAAAGTACCCTTGCGCAA<br/> ATGTATCCGCTGCAAGAGATTCAAACCTGACGGTTAAGCTGCAACTTCAGGCCCTCCAACAAA<br/> ATGGATCCTCAGTCTTGTGAGAAGACAAAAGCAAGCGACTGAACACCATCCTTAACACCATGTC<br/> AACCATATATTCAACAGGTAAAGTTTGCAATCCGGATAACCCCAAGAATGTTTGCTTCTTGAA<br/> CCCGGTCTCAACGAAATTATGGCCAACAGTCTTGATTACAACGAGCGATTGTGGGCATGGGAAA<br/> GTTGGAGGAGTGAAGTAGGCAAACAGTTGAGACCTCTTTATGAAGAGTACGTTGTCCTTAAAAA<br/> TGAAATGGCTCGCGCGAATCATTATGAAGACTATGGTACTACTGGAGGGGGATTATGAGGTG<br/> AACGGGTGGACGGATACGATTACTCTAGGGGCCAGCTGATAGAGGATGTCGAGCACACCTTTG<br/> AGGAGATTAAGCCGTTGTACGAACATTTGCACGCCTATGTCAGGGCTAAGCTCATGAACGCTTA<br/> TCCGAGTTATATCTCCCGATAGGATGCTTGCCCTGCTCACTTGTGGGCGATATGTGGGGACGC<br/> TTTTGGACCAACTTGATTCCCTTACGGTACCGTTCGGCCAGAAACCAATATCGACGTGACAG<br/> ACGCAATGGTGGATCAAGCATGGGATGCGCAACGAATCTTCAAGGAGGCAGAAAAATTTTTCGT<br/> TTCAGTTGGACTCCCAAACATGACGCAGGGTTTCTGGGAGAACTCAATGTTGACAGATCCAGGT<br/> AATGTGCAGAAAGCGGTTTGCCACCCTACTGCATGGGATCTTGGTAAAGGGGACTTCCGCATAC<br/> TCATGTGTACGAAAGTAACTATGGACGACTTTCTTACTGCGCACCACGAGATGGGGCACATACA<br/> ATACGATATGGCGTACGCAGCTCAACCTTTCCTTCTGCGGAACGGGGCGAATGAAGGATTTAC<br/> GAGGCAGTGGGTGAGATTATGTCCCTGTCAGCTGCCACTCCGAAACATCTGAAAAGCATCGGCC<br/> TGTTGAGCCCAGACTTCCAAGAAGATAATGAGACCGAAATAAACTTCCTTCTGAAGCAAGCACT<br/> GACTATTGTAGGTACCTTGCCCTTTACATACATGCTGGAGAAGTGGAGGTGGATGGTATTTAAG<br/> GGGAGATACCGAAAGATCAATGGATGAAAAAGTGGTGGGAAATGAAAAGGGAGATCGTTGGCG<br/> TAGTTGAACCAGTACCGCATGATGAGACGTACTGCGATCCGGCTAGTCTGTTCCATGTCTCTAA<br/> TGATTACTCTTTCATCCGCTACTACACCCGCACGCTGTATCAATTCCAGTTCGAAGAAGCTCTC<br/> TGTCAGGCTGCCAAGCACGAAGGACCGCTGCACAAATGCGACATTAGCAATTCTACAGAGGCGG<br/> GTCAGAAGTTGTTCAATATGCTTAGACTGGGAAGAGCGAACCCTGGACGCTCGCTTTGGAGAA<br/> CGTTGTTGGAGCTAAGAATATGAACGTCAGGCCCTTGTGAATTACTTTGAACCTCTGTTTACG<br/> TGGTTGAAAGACCAAAATAAAAACCTCCTTTGTTGGGTGGAGTACTGACTGGTCCCCCTATGCG</p> |
| 14   | <p>CAATCTACCATCGAAGAGCAGGCCAAAACATTCCTCGACAAGTTTAATGTCGAGGCTGAAGACC<br/> TTTTCTACCAATCAAGTCTGGCTAGCTGGAATTACAATACAAACATTACAGAGGAGAACGTACA<br/> AAACATGAATAACGCAGGGGACAAGTGGAGCGCATTCTTAAGGAACAAAGTACCCTTGCGCAA</p>                                                                                                                                                                                                                                                                                                                                                                                                                                                                                                                                                                                                                                                                                                                                                                                                                                                                                                                                                                                                                                                                                                                                                                                                                                                                                                                                                                                                                                                                                                                                                                                                                                                                                                                                                                                                           |

|     |                                                                                                                                                                                                                                                                                                                                                                                                                                                                                                                                                                                                                                                                                                                                                                                                                                                                                                                                                                                                                                                                                                                                                                                                                                                                                                                                                                                                                                                                                                                                                                                                                                                                                                                                                                                                           |
|-----|-----------------------------------------------------------------------------------------------------------------------------------------------------------------------------------------------------------------------------------------------------------------------------------------------------------------------------------------------------------------------------------------------------------------------------------------------------------------------------------------------------------------------------------------------------------------------------------------------------------------------------------------------------------------------------------------------------------------------------------------------------------------------------------------------------------------------------------------------------------------------------------------------------------------------------------------------------------------------------------------------------------------------------------------------------------------------------------------------------------------------------------------------------------------------------------------------------------------------------------------------------------------------------------------------------------------------------------------------------------------------------------------------------------------------------------------------------------------------------------------------------------------------------------------------------------------------------------------------------------------------------------------------------------------------------------------------------------------------------------------------------------------------------------------------------------|
|     | <p>ATGTATCCGCTGCAAGAGATTCAAACCTGACGGTTAAGCTGCAACTTCAGGCCCTCCAACAAA<br/> ATGGAAGTTCAGTCTTGTGTCAGAAGACAAAAGCAAGCGACTGAACACCATCCTTAACACCATGTC<br/> AACCATATATTCAACAGGTAAAGTTTGAATCCGGATAACCCCAAGAATGTTTGCTTCTTGAA<br/> CCCGGTCTCAACGAAATTATGGCCAACAGTCTTGATTACAACGAGCGATTGTGGGCATGGGAAA<br/> GTTGGAGGAGTGAGGTAGGCAAACAGTTGAGACCTCTTTATGAAGAGTACGTTGTCTTAAAAA<br/> TGAAATGGCTCGCGCGAATCATTATGAAGACTATGGTGACTACTGGAGGGGGATTATGAGGTG<br/> AACGGGGTGGACGGATACGATTACTCTAGGGGCCAGCTGATAGAGGATGTCGAGCACACCTTTG<br/> AGGAGATTAAGCCGTTGTACGAACATTTGCACGCCTATGTCAGGGCTAAGCTCATGAACGCTTA<br/> TCCGAGTTATATCTCCCCGATAGGATGCTTGCCTGCTCACTTGTTGGGCGATATGTGGGGACGC<br/> TTTTGGACCAACTTGATTCCCTTACGGTACCGTTCGGCCAGAAACCAATATCGACGTGACAG<br/> ACGCAATGGTGGATCAAGCATGGGATGCGCAACGAATCTTCAAGGAGGCAGAAAAATTTTTCGT<br/> TTCAGTTGGACTCCCAAACATGACGCAGGGTTTCTGGGAGAACTCAATGTTGACAGATCCAGGT<br/> AATGTGCAGAAAGCGGTTTGCCACCCTACTGCATGGGATCTTGGTAAAGGGGACTTCCGCATAC<br/> TCATGTGTACGAAAGTAACTATGGACGACTTTCTTACTGCGCACCACGAGATGGGGCACATACA<br/> ATACGATATGGCGTACGCAGCTCAACCTTTCCTTCTGCGGAACGGGGCGAATGAAGGATTTTAC<br/> GAGGCAGTGGGTGAGATTATGTCCCTGTCAGCTGCCACTCCGAAACATCTGAAAAGCATCGGCC<br/> TGTTGAGCCCAGACTTCCAAGAAGATAATGAGACCGAAATAAACTTCTTCTGAAGCAAGCACT<br/> GACTATTGTAGGTACCTTGCCCTTACCTACATGCTGGAGAAGTGGAGGTGGATGGTATTTAAG<br/> GGGGAGATACCGAAAGATCAATGGATGAAAAAGTGGTGGGAAATGAAAAGGGAGATCGTTGGCG<br/> TAGTTGAACCAGTACCGCATGATGAGACGTACTGCGATCCGGCTAGTCTGTTCCATGTCTCTAA<br/> TGATTACTTTTCATCCGCTACTACACCCGCACGCTGTATCAATTCCAGTTCCAAGAAGCTCTC<br/> TGTCAGGCTGCCAAGCACGAAGGACCGCTGCACAAATGCGACATTAGCAATTCTACAGAGGCGG<br/> GTCAGAAGTTGTTCAATATGCTTAGACTGGGGAAGAGCGAACCCTGGACGCTCGCTTTGGAGAA<br/> CGTTGTTGGAGCTAAGAATATGAACGTCAGGCCCTTGTGAATTACTTTGAACCTCTGTTTACG<br/> TGTTGAAAGACCAAATAAAAACTCCTTGTGGGTGGAGTACTGACTGGTCCCCCTATGCC</p> |
| 295 | <p>CAATCTACCATCGAAGAGCAGGCCAAAACATTCTCGACAAGTTTAAATGTCGAGGCTGAAGACC<br/> TTTTCTACCAATCAAGTCTGGCTAGCTGGAATTACAATACAAACATTACAGAGGAGAACGTACA<br/> AAACATGAATAACGCAGGGGACAAGTGGAGCGCATTCTTAAGGAACAAAGTACCCTTGCGCAA<br/> ATGTATCCGCTGCAAGAGATTCAAACCTGACGGTTAAGCTGCAACTTCAGGCCCTCCAACAAA<br/> ATGGATCCTCAGTCTTGTGTCAGAAGACAAAAGCAAGCGACTGAACACCATCCTTAACACCATGTC<br/> AACCATATATTCAACAGGTAAAGTTTGAATCCGGATAACCCCAAGAATGTTTGCTTCTTGAA<br/> CCCGGTCTCAACGAAATTATGGCCAACAGTCTTGATTACAACGAGCGATTGTGGGCATGGGAAA<br/> GTTGGAGGAGTGAGGTAGGCAAACAGTTGAGACCTCTTTATGAAGAGTACGTTGTCTTAAAAA<br/> TGAAATGGCTCGCGCGAATCATTATGAAGACTATGGTGACTACTGGAGGGGGATTATGAGGTG<br/> AACGGGGTGGACGGATACGATTACTCTAGGGGCCAGCTGATAGAGGATGTCGAGCACACCTTTG<br/> AGGAGATTAAGCCGTTGTACGAACATTTGCACGCCTATGTCAGGGCTAAGCTCATGAACGCTTA<br/> TCCGAGTTATATCTCCCCGATAGGATGCTTGCCTGCTCACTTGTTGGGCGATATGTGGGGACGC<br/> TTTTGGACCAACTTGATTCCCTTACGGTACCGTTCGGCCAGAAACCAATATCGACGTGACAG<br/> ACGCAATGGTGGATCAAGCATGGGATGCGCAACGAATCTTCAAGGAGGCAGAAAAATTTTTCGT<br/> TTCAGTTGGACTCCCAAACATGACGCAGGGTTTCTGGGAGAACTCAATGTTGACAGATCCAGGT<br/> AATGTGCAGAAAGCGGTTTGCCACCCTACTGCATGGGATCTTGGTAAAGGGGACTTCCGCATAC<br/> TCATGTGTACGAAAGTAACTATGGACGACTTTCTTACTGCGCACCACGAGATGGGGCACATACA<br/> ATACGATATGGCGTACGCAGCTCAACCTTTCCTTCTGCGGAACGGGGCGAATGAAGGATTTTAC<br/> GAGGCAGTGGGTGAGATTATGTCCCTGTCAGCTGCCACTCCGAAACATCTGAAAAGCATCGGCC<br/> TGTTGAGCCCAGACTTCCAAGAAGATAATGAGACCGAAATAAACTTCTTCTGAAGCAAGCACT<br/> GACTATTGTAGGTACCTTGCCCTTACATACATGCTGGAGAAGTGGAGGTGGATGGTATTTAAG<br/> GGGGAGATACCGAAAGATCAATGGATGAAAAAGTGGTGGGAAATGAAAAGGGAGATCGTTGGCG</p>                                                                                                                                                                                                             |

|     |                                                                                                                                                                                                                                                                                                                                                                                                                                                                                                                                                                                                                                                                                                                                                                                                                                                                                                                                                                                                                                                                                                                                                                                                                                                                                                                                                                                                                                                                                                                                                                                                                                                                                                                                                                                                                                                                                                                                                                                                                                |
|-----|--------------------------------------------------------------------------------------------------------------------------------------------------------------------------------------------------------------------------------------------------------------------------------------------------------------------------------------------------------------------------------------------------------------------------------------------------------------------------------------------------------------------------------------------------------------------------------------------------------------------------------------------------------------------------------------------------------------------------------------------------------------------------------------------------------------------------------------------------------------------------------------------------------------------------------------------------------------------------------------------------------------------------------------------------------------------------------------------------------------------------------------------------------------------------------------------------------------------------------------------------------------------------------------------------------------------------------------------------------------------------------------------------------------------------------------------------------------------------------------------------------------------------------------------------------------------------------------------------------------------------------------------------------------------------------------------------------------------------------------------------------------------------------------------------------------------------------------------------------------------------------------------------------------------------------------------------------------------------------------------------------------------------------|
|     | <p>TAGTTGAACCAGTACCGCATGATGAGACGTACTGCGATCCGGCTAGTCTGTTCCATGTCTCTAA<br/> TGATTACTCTTTCATCCGCTACTACACCCGCACGCTGTATCAATTCCAGTTCCAAGAAGCTCTC<br/> TGTCAGGCTGCCAAGCACGAAGGACCGCTGCACAAATGCGACATTAGCAATTCTACAGAGGCGG<br/> GTCAGAAGTTGTTCAATATGCTTAGACTGGGAAGAGCGAACCCTGGACGCTCGCTTTGGAGAA<br/> CGTTGTTGGAGCTAAGAATATGAACGTCAGGCCCTTGCTGAATTACTTTGAACCTCTGTTTACG<br/> TGGTTGAAAGACCAAAAATAAAAACCTCCTTTGTTGGGTGGAGTACTGACTGGTCCCCCTATGCGG<br/> ACCAAAGCATCAAAGTGAGGATAAGCCTAAAATCAGCTCTTGGAGATAAAGCATATGAATGGAA<br/> CGACAATGAAATGTACCTGTTCCGATCATCTGTTGCATATGCTATGAGGCAGTACTTTTTAAAA<br/> GAAAAAATCAGATGATTCTTTTTGGGGAGGAGGATGTGCGAGTGGCTAATTTGAAACCAAGAA<br/> TCTCCTTTAATTTCTTTGTCACTGCACCTAAAATGTGTCTGATATCATTCTAGAACTGAAGT<br/> TGAAAAGGCCATCAGGATGTCCCGGAGCCGTATCAATGATGCTTTCCGTCTGAATGACAACAGC<br/> CTAGAGTTTCTGGGGATACAGCCAACACTTGGACCTCCTAACCAGCCCCCTGTTTCC</p>                                                                                                                                                                                                                                                                                                                                                                                                                                                                                                                                                                                                                                                                                                                                                                                                                                                                                                                                                                                                                                                                                                                                                               |
| 19  | <p>CAATCTACCATCGAAGAGCAGGCCAAAACATTCTCGACTTCTTTAATATCCAGGCTGAAGACC<br/> TTTTCTACCAATCAAGTCTGGCTAGCTGGAATTACAATACAAACATTACAGAGGAGAACGTACA<br/> AAACATGAATAACGCAGGGGACAAGTGGAGCGCATTCTTAAGGAACAAAGTACCCTTGCGCAA<br/> ATGTATCCGCTGCAAGAGATTCAAACCTGACGGTTAAGCTGCAACTTCAGGCCCTCCAACAAA<br/> ATGGAAGTTCAGTCTTGTGAGAAGACAAAAGCAAGCGACTGAACACCATCCTTAACACCATGTC<br/> AACCATATATTCAACAGGTAAAGTTTGAATCCGGATAACCCCCAAGAATGTTTGCTTCTTGAA<br/> CCCGGTCTCAACGAAATTATGGCCAACAGTCTTGATTACAACGAGCGATTGTGGGCATGGGAAA<br/> GTTGGAGGAGTGAGGTAGGCAAACAGTTGAGACCTCTTTATGAAGAGTACGTTGTCTTAAAAA<br/> TGAAATGGCTCGCGCGAATCATTATGAAGACTATGGTGACTACTGGAGGGGGGATTATGAGGTG<br/> AACGGGTGGACGGATACGATTACTCTAGGGGCCAGCTGATAGAGGATGTCGAGCACACCTTTG<br/> AGGAGATTAAGCCGTTGTACGAACATTTGCACGCCTATGTCAGGGCTAAGCTCATGAACGCTTA<br/> TCCGAGTTATATCTCCCCGATAGGATGCTTGCCTGCTCACTTGTTGGGCGATATGTGGGGACGC<br/> TTTTGGACCAACTTGATTCCCTTACGGTACCGTTCGGCCAGAAACCAATATCGACGTGACAG<br/> ACGCAATGGTGGATCAAGCATGGGATGCGCAACGAATCTTCAAGGAGGCAGAAAAATTTTTCGT<br/> TTCAGTTGGACTCCCAAACATGACGCAGGGTTTCTGGGAGAACTCAATGTTGACAGATCCAGGT<br/> AATGTGCAGAAAGCGGTTTGCCACCCTACTGCATGGGATCTTGGTAAAGGGGACTTCCGCATAC<br/> TCATGTGTACGAAAGTAACTATGGACGACTTTCTTACTGCGCACCACGAGATGGGGCACATACA<br/> ATACGATATGGCGTACGCAGCTCAACCTTTCCTTCTGCGGAACGGGGCGAATGAAGGATTTAC<br/> GAGGCAGTGGGTGAGATTATGTCCCTGTCAGCTGCCACTCCGAAACATCTGAAAAGCATCGGCC<br/> TGTTGAGCCCAGACTTCCAAGAAGATAATGAGACCGAAATAAACTTCTTCTGAAGCAAGCACT<br/> GACTATTGTAGGTACCTTGCCCTTACCTACATGCTGGAGAAGTGGAGGTGGATGGTATTTAAG<br/> GGGGAGATACCGAAAGATCAATGGATGAAAAAGTGGTGGGAAATGAAAAGGGAGATCGTTGGCG<br/> TAGTTGAACCAGTACCGCATGATGAGACGTACTGCGATCCGGCTAGTCTGTTCCATGTCTCTAA<br/> TGATTACTCTTTCATCCGCTACTACACCCGCACGCTGTATCAATTCCAGTTCCAAGAAGCTCTC<br/> TGTCAGGCTGCCAAGCACGAAGGACCGCTGCACAAATGCGACATTAGCAATTCTACAGAGGCGG<br/> GTCAGAAGTTGTTCAATATGCTTAGACTGGGAAGAGCGAACCCTGGACGCTCGCTTTGGAGAA<br/> CGTTGTTGGAGCTAAGAATATGAACGTCAGGCCCTTGCTGAATTACTTTGAACCTCTGTTTACG<br/> TGGTTGAAAGACCAAAAATAAAAACCTCCTTTGTTGGGTGGAGTACTGACTGGTCCCCCTATGCG</p> |
| 293 | <p>CAATCTACCATCGAAGAGCAGGCCAAAACATTCTCGACTTCTTTAATATCCAGGCTGAAGACC<br/> TTTTCTACCAATCAAGTCTGGCTAGCTGGAATTACAATACAAACATTACAGAGGAGAACGTACA<br/> AAACATGAATAACGCAGGGGACAAGTGGAGCGCATTCTTAAGGAACAAAGTACCCTTGCGCAA<br/> ATGTATCCGCTGCAAGAGATTCAAACCTGACGGTTAAGCTGCAACTTCAGGCCCTCCAACAAA<br/> ATGGAAGTTCAGTCTTGTGAGAAGACAAAAGCAAGCGACTGAACACCATCCTTAACACCATGTC<br/> AACCATATATTCAACAGGTAAAGTTTGAATCCGGATAACCCCCAAGAATGTTTGCTTCTTGAA<br/> CCCGGTCTCAACGAAATTATGGCCAACAGTCTTGATTACAACGAGCGATTGTGGGCATGGGAAA</p>                                                                                                                                                                                                                                                                                                                                                                                                                                                                                                                                                                                                                                                                                                                                                                                                                                                                                                                                                                                                                                                                                                                                                                                                                                                                                                                                                                                                                                                                                                                        |

|     |                                                                                                                                                                                                                                                                                                                                                                                                                                                                                                                                                                                                                                                                                                                                                                                                                                                                                                                                                                                                                                                                                                                                                                                                                                                                                                                                                                                                                                                                                                                                                                                                                                                                                                                                                                                                                                                                                                                                                          |
|-----|----------------------------------------------------------------------------------------------------------------------------------------------------------------------------------------------------------------------------------------------------------------------------------------------------------------------------------------------------------------------------------------------------------------------------------------------------------------------------------------------------------------------------------------------------------------------------------------------------------------------------------------------------------------------------------------------------------------------------------------------------------------------------------------------------------------------------------------------------------------------------------------------------------------------------------------------------------------------------------------------------------------------------------------------------------------------------------------------------------------------------------------------------------------------------------------------------------------------------------------------------------------------------------------------------------------------------------------------------------------------------------------------------------------------------------------------------------------------------------------------------------------------------------------------------------------------------------------------------------------------------------------------------------------------------------------------------------------------------------------------------------------------------------------------------------------------------------------------------------------------------------------------------------------------------------------------------------|
|     | <p>GTTGGAGGAGTGAGGTAGGCAAACAGTTGAGACCTCTTTATGAAGAGTACGTTGTCCTTAAAAA<br/> TGAAATGGCTCGCGCGAATCATTATGAAGACTATGGTGACTACTGGAGGGGGGATTATGAGGTG<br/> AACGGGGTGGACGGATACGATTACTCTAGGGGCCAGCTGATAGAGGATGTCGAGCACACCTTTG<br/> AGGAGATTAAGCCGTTGTACGAACATTTGCACGCCTATGTCAGGGCTAAGCTCATGAACGCTTA<br/> TCCGAGTTATATCTCCCCGATAGGATGCTTGCCTGCTCACTTGTGGGGCGATATGTGGGGACGC<br/> TTTTGGACCAACTTGATTCCCTTACGGTACCGTTCGGCCAGAAACCAATATCGACGTGACAG<br/> ACGCAATGGTGGATCAAGCATGGGATGCGCAACGAATCTTCAAGGAGGCAGAAAAATTTTTTCGT<br/> TTCAGTTGGACTCCCAAACATGACGCAGGGTTTCTGGGAGAACTCAATGTTGACAGATCCAGGT<br/> AATGTGCAGAAAGCGGTTTGCCACCCTACTGCATGGGATCTTGGTAAAGGGGACTTCCGCATAC<br/> TCATGTGTACGAAAGTAACTATGGACGACTTTCTTACTGCGCACCACGAGATGGGGCACATACA<br/> ATACGATATGGCGTACGCAGCTCAACCTTTCCTTCTGCGGAACGGGGCGAATGAAGGATTTTAC<br/> GAGGCAGTGGGTGAGATTATGTCCCTGTCAGCTGCCACTCCGAAACATCTGAAAAGCATCGGCC<br/> TGTTGAGCCCAGACTTCCAAGAAGATAATGAGACCGAAATAAATTCCTTCTGAAGCAAGCACT<br/> GACTATTGTAGGTACCTTGCCCTTTACATACATGCTGGAGAAGTGGAGGTGGATGGTATTTAAG<br/> GGGGAGATAACCGAAAGATCAATGGATGAAAAAGTGGTGGGAAATGAAAAGGGAGATCGTTGGCG<br/> TAGTTGAACCAGTACCGCATGATGAGACGTACTGCGATCCGGCTAGTCTGTTCCATGTCTCTAA<br/> TGATTACTCTTTCATCCGCTACTACACCCGCACGCTGTATCAATTCCAGTTCCAAGAAGCTCTC<br/> TGTCAGGCTGCCAAGCACGAAGGACCGCTGCACAAATGCGACATTAGCAATTCTACAGAGGCGG<br/> GTCAGAAGTTGTTCAATATGCTTAGACTGGGGAAGAGCGAACCCTGGACGCTCGCTTTGGAGAA<br/> CGTTGTTGGAGCTAAGAATATGAACGTCAGGCCCTTGTGAATTACTTTGAACCTCTGTTTACG<br/> TGGTTGAAAGACCAAAATAAAAATCCTTTGTTGGGTGGAGTACTGACTGGTCCCCCTATGCGG<br/> ACCAAAGCATCAAAGTGAGGATAAGCCTAAAATCAGCTCTTGGAGATAAAGCATATGAATGGAA<br/> CGACAATGAAATGTACCTGTTCCGATCATCTGTTGCATATGCTATGAGGCAGTACTTTTTTAAAA<br/> GTAAAAAATCAGATGATTCTTTTTGGGGAGGAGGATGTGCGAGTGGCTAATTTGAAACCAAGAA<br/> TCTCCTTTAATTTCTTTGTCACTGCACCTAAAATGTGTCTGATATCATTCTAGAACTGAAGT<br/> TGAAAAGGCCATCAGGATGTCCCGGAGCCGTATCAATGATGCTTTCCTGCTGAATGACAACAGC<br/> CTAGAGTTTCTGGGGATACAGCCAACACTTGGACCTCCTAACCAGCCCCCTGTTTCC</p> |
| 117 | <p>CAATCTACCATCGAAGAGCAGGCCAAAACATTCCTCGACAAGTTTAATCACGAGGCTGAAGACC<br/> TTTTCTACCAATCAAGTCTGGCTAGCTGGAATTACAATACAAACATTACAGAGGAGAACGTACA<br/> AAACATGAATAACGCAGGGGACAAGTGGAGCGCATTCCCTTAAGGAACAAAGTACCCTTGCGCAA<br/> ATGTATCCGCTGCAAGAGATTCAACAACCTGACGGTTAAGCTGCAACTTCAGGCCCTCCAACAAA<br/> ATGGATCCTCAGTCTTGTGAGAAGACAAAAGCAAGCGACTGAACACCATCCTTAACACCATGTC<br/> AACCATATATTCAACAGGTAAAGTTTGCAATCCGGATAACCCCAAGAATGTTTGCTTCTTGAA<br/> CCCGGTCTCAACGAAATTATGGCCAACAGTCTTGATTACAACGAGCGATTGTGGGCATGGGAAA<br/> GTTGGAGGAGTGAGGTAGGCAAACAGTTGAGACCTCTTTATGAAGAGTACGTTGTCCTTAAAAA<br/> TGAAATGGCTCGCGCGAATCATTATGAAGACTATGGTGACTACTGGAGGGGGGATTATGAGGTG<br/> AACGGGGTGGACGGATACGATTACTCTAGGGGCCAGCTGATAGAGGATGTCGAGCACACCTTTG<br/> AGGAGATTAAGCCGTTGTACGAACATTTGCACGCCTATGTCAGGGCTAAGCTCATGAACGCTTA<br/> TCCGAGTTATATCTCCCCGATAGGATGCTTGCCTGCTCACTTGTGGGGCGATATGTGGGGACGC<br/> TTTTGGACCAACTTGATTCCCTTACGGTACCGTTCGGCCAGAAACCAATATCGACGTGACAG<br/> ACGCAATGGTGGATCAAGCATGGGATGCGCAACGAATCTTCAAGGAGGCAGAAAAATTTTTTCGT<br/> TTCAGTTGGACTCCCAAACATGACGCAGGGTTTCTGGGAGAACTCAATGTTGACAGATCCAGGT<br/> AATGTGCAGAAAGCGGTTTGCCACCCTACTGCATGGGATCTTGGTAAAGGGGACTTCCGCATAC<br/> TCATGTGTACGAAAGTAACTATGGACGACTTTCTTACTGCGCACAACGAGATGGGGAACATACA<br/> ATACGATATGGCGTACGCAGCTCAACCTTTCCTTCTGCGGAACGGGGCGAATGAAGGATTTTAC<br/> GAGGCAGTGGGTGAGATTATGTCCCTGTCAGCTGCCACTCCGAAACATCTGAAAAGCATCGGCC<br/> TGTTGAGCCCAGACTTCCAAGAAGATAATGAGACCGAAATAAATTCCTTCTGAAGCAAGCACT</p>                                                                                                                                                                                                                                                                                                                                                                                                                                                                                                 |

|      |                                                                                                                                                                                                                                                                                                                                                                                                                                                                                                                                                                                                                                                                                                                                                                                                                                                                                                                                                                                                                                                                                                                                                                                                                                                                                                                                                                                                                                                                                                                                                                                                                                                                                                                                                                                                                                                                                                                                                                                                                                      |
|------|--------------------------------------------------------------------------------------------------------------------------------------------------------------------------------------------------------------------------------------------------------------------------------------------------------------------------------------------------------------------------------------------------------------------------------------------------------------------------------------------------------------------------------------------------------------------------------------------------------------------------------------------------------------------------------------------------------------------------------------------------------------------------------------------------------------------------------------------------------------------------------------------------------------------------------------------------------------------------------------------------------------------------------------------------------------------------------------------------------------------------------------------------------------------------------------------------------------------------------------------------------------------------------------------------------------------------------------------------------------------------------------------------------------------------------------------------------------------------------------------------------------------------------------------------------------------------------------------------------------------------------------------------------------------------------------------------------------------------------------------------------------------------------------------------------------------------------------------------------------------------------------------------------------------------------------------------------------------------------------------------------------------------------------|
|      | <p>GACTATTGTAGGTACCTTGCCCTTTACATACATGCTGGAGAAGTGGAGGTGGATGGTATTTAAG<br/> GGGGAGATACCGAAAGATCAATGGATGAAAAAGTGGTGGGAAATGAAAAGGGAGATCGTTGGCG<br/> TAGTTGAACCAGTACCGCATGATGAGACGTACTGCGATCCGGCTAGTCTGTTCCATGTCTCTAA<br/> TGATTACTCTTTCATCCGCTACTACACCCGCACGCTGTATCAATTCCAGTTCCAAGAAGCTCTC<br/> TGTCAGGCTGCCAAGCACGAAGGACCGCTGCACAAATGCGACATTAGCAATTCTACAGAGGCGG<br/> GTCAGAAGTTGTTCAATATGCTTAGACTGGGGAAGAGCGAACCGTGGACGCTCGCTTTGGAGAA<br/> CGTTGTTGGAGCTAAGAATATGAACGTCAGGCCCTTGCTGAATTACTTTGAACCTCTGTTTACG<br/> TGGTTGAAAGACCAAAAATAAAAACCTCCTTTGTTGGGTGGAGTACTGACTGGTCCCCCTATGCG</p>                                                                                                                                                                                                                                                                                                                                                                                                                                                                                                                                                                                                                                                                                                                                                                                                                                                                                                                                                                                                                                                                                                                                                                                                                                                                                                                                                                                                                                                   |
| Y117 | <p>CAATCTACCATCGAAGAGCAGGCCAAAACATTCCTCGACAAGTTTAATCACGAGGCTGAAGACC<br/> TTTTCTACCAATCAAGTCTGGCTAGCTGGAATTACAATACAAACATTACAGAGGAGAACGTACA<br/> AAACATGAATAACGCAGGGGACAAGTGGAGCGCATTCTTAAGGAACAAAGTACCCTTGCGCAA<br/> ATGTATCCGCTGCAAGAGATTCAACAACCTGACGGTTAAGCTGCAACTTCAGGCCCTCCAACAAA<br/> ATGGATCCTCAGTCTTGTGAGAAGACAAAAGCAAGCGACTGAACACCATCCTTAACACCATGTC<br/> AACCATATATTCAACAGGTAAAGTTTGCAATCCGGATAACCCCAAGAATGTTTGCTTCTTGAA<br/> CCCGGTCTCAACGAAATTATGGCCAACAGTCTTGATTACAACGAGCGATTGTGGGCATGGGAAA<br/> GTTGGAGGAGTGGGTAGGCAAACAGTTGAGACCTCTTTATGAAGAGTACGTTGTCCTTAAAAA<br/> TGAAATGGCTCGCGCGAATCATTATGAAGACTATGGTGACTACTGGAGGGGGGATTATGAGGTG<br/> AACGGGGTGGACGGATACGATTACTCTAGGGGCCAGCTGATAGAGGATGTCGAGCACACCTTTG<br/> AGGAGATTAAGCCGTTGTACGAACATTTGCACGCCTATGTCAGGGCTAAGCTCATGAACGCTTA<br/> TCCGAGTTATATCTCCCGATAGGATGCTTGCCTGCTCACTTGTTGGGCGATATGTGGGGACGC<br/> TTTTGGACCAACTTGATTCCCTTACGGTACCGTTCGGCCAGAAACCAATATCGACGTGACAG<br/> ACGCAATGGTGGATCAAGCATGGGATGCGCAACGAATCTTCAAGGAGGCAGAAAAATTTTTCGT<br/> TTCAGTTGGACTCCCAAACATGACGCAGGGTTTCTGGGAGAACTCAATGTTGACAGATCCAGGT<br/> AATGTGCAGAAAGCGGTTTGCCACCCTACTGCATGGGATCTTGGTAAAGGGGACTTCCGCATAC<br/> TCATGTGTACGAAAGTAACTATGGACGACTTTCTTACTGCGCACCACGAGATGGGGCACATACA<br/> ATACGATATGGCGTACGCAGCTCAACCTTTCCTTCTGCGGAACGGGGCGAATGAAGGATTTTAC<br/> GAGGCAGTGGGTGAGATTATGTCCCTGTCAGCTGCCACTCCGAAACATCTGAAAAGCATCGGCC<br/> TGTTGAGCCCAGACTTCCAAGAAGATAATGAGACCGAAATAAACTTCTTCTGAAGCAAGCACT<br/> GACTATTGTAGGTACCTTGCCCTTTACATACATGCTGGAGAAGTGGAGGTGGATGGTATTTAAG<br/> GGGGAGATACCGAAAGATCAATGGATGAAAAAGTGGTGGGAAATGAAAAGGGAGATCGTTGGCG<br/> TAGTTGAACCAGTACCGCATGATGAGACGTACTGCGATCCGGCTAGTCTGTTCCATGTCTCTAA<br/> TGATTACTCTTTCATCCGCTACTACACCCGCACGCTGTATCAATTCCAGTTCCAAGAAGCTCTC<br/> TGTCAGGCTGCCAAGCACGAAGGACCGCTGCACAAATGCGACATTAGCAATTCTACAGAGGCGG<br/> GTCAGAAGTTGTTCAATATGCTTAGACTGGGGAAGAGCGAACCGTGGACGCTCGCTTTGGAGAA<br/> CGTTGTTGGAGCTAAGAATATGAACGTCAGGCCCTTGCTGAATTACTTTGAACCTCTGTTTACG<br/> TGGTTGAAAGACCAAAAATAAAAACCTCCTTTGTTGGGTGGAGTACTGACTGGTCCCCCTATGCG</p> |
| 118  | <p>CAATCTACCATCGAAGAGCAGGCCAAAACATTCCTCGACAAGTTTAATGTCGAGGCTGAAGACC<br/> TTTTCTACCAATCAAGTCTGGCTAGCTGGAATTACAATACAAACATTACAGAGGAGAACGTACA<br/> AAACATGAATAACGCAGGGGACAAGTGGAGCGCATTCTTAAGGAACAAAGTACCCTTGCGCAA<br/> ATGTATCCGCTGCAAGAGATTCAACAACCTGACGGTTAAGCTGCAACTTCAGGCCCTCCAACAAA<br/> ATGGATCCTCAGTCTTGTGAGAAGACAAAAGCAAGCGACTGAACACCATCCTTAACACCATGTC<br/> AACCATATATTCAACAGGTAAAGTTTGCAATCCGGATAACCCCAAGAATGTTTGCTTCTTGAA<br/> CCCGGTCTCAACGAAATTATGGCCAACAGTCTTGATTACAACGAGCGATTGTGGGCATGGGAAA<br/> GTTGGAGGAGTGGGTAGGCAAACAGTTGAGACCTCTTTATGAAGAGTACGTTGTCCTTAAAAA<br/> TGAAATGGCTCGCGCGAATCATTATGAAGACTATGGTGACTACTGGAGGGGGGATTATGAGGTG<br/> AACGGGGTGGACGGATACGATTACTCTAGGGGCCAGCTGATAGAGGATGTCGAGCACACCTTTG<br/> AGGAGATTAAGCCGTTGTACGAACATTTGCACGCCTATGTCAGGGCTAAGCTCATGAACGCTTA</p>                                                                                                                                                                                                                                                                                                                                                                                                                                                                                                                                                                                                                                                                                                                                                                                                                                                                                                                                                                                                                                                                                                                                                                                                                                    |

|     |                                                                                                                                                                                                                                                                                                                                                                                                                                                                                                                                                                                                                                                                                                                                                                                                                                                                                                                                                                                                                                                                                                                                                                                                                                                                                                                                                                                                                                                                                                                                                                                                                                                                                                                                                                                                                                                                                                                                                                                                                                 |
|-----|---------------------------------------------------------------------------------------------------------------------------------------------------------------------------------------------------------------------------------------------------------------------------------------------------------------------------------------------------------------------------------------------------------------------------------------------------------------------------------------------------------------------------------------------------------------------------------------------------------------------------------------------------------------------------------------------------------------------------------------------------------------------------------------------------------------------------------------------------------------------------------------------------------------------------------------------------------------------------------------------------------------------------------------------------------------------------------------------------------------------------------------------------------------------------------------------------------------------------------------------------------------------------------------------------------------------------------------------------------------------------------------------------------------------------------------------------------------------------------------------------------------------------------------------------------------------------------------------------------------------------------------------------------------------------------------------------------------------------------------------------------------------------------------------------------------------------------------------------------------------------------------------------------------------------------------------------------------------------------------------------------------------------------|
|     | <p>TCCGAGTTATATCTCCCCGATAGGATGCTTGCCTGCTCACTTGTTGGGCGATATGTGGGGACGC<br/> TTTTGGACCAACTTGTATTCCCTTACGGTACCGTTCGGCCAGAAACCAAATATCGACGTGACAG<br/> ACGCAATGGTGGATCAAGCATGGGATGCGCAACGAATCTTCAAGGAGGCAGAAAAATTTTTCGT<br/> TTCAGTTGGACTCCCAAACATGACGCAGGGTTTCTGGGAGAACTCAATGTTGACAGATCCAGGT<br/> AATGTGCAGAAAGCGGTTTGGCCACCCTACTGCATGGGATCTTGGTAAAGGGGACTTCCGCATAC<br/> TCATGTGTACGAAAGTAACTATGGACGACTTTCTTACTGCGCACAACGAGATGGGGAACATACA<br/> ATACGATATGGCGTACGCAGCTCAACCTTTCCTTCTGCGGAACGGGGCGAATGAAGGATTTTAC<br/> GAGGCAGTGGGTGAGATTATGTCCCTGTCAGCTGCCACTCCGAAACATCTGAAAAGCATCGGCC<br/> TGTTGAGCCCAGACTTCCAAGAAGATAATGAGACCGAAATAAACTTCTTCTGAAGCAAGCACT<br/> GACTATTGTAGGTACCTTGCCCTTTACATACATGCTGGAGAAGTGGAGGTGGATGGTATTTAAG<br/> GGGGAGATACCGAAAGATCAATGGATGAAAAAGTGGTGGGAAATGAAAAGGGAGATCGTTGGCG<br/> TAGTTGAACCAGTACCGCATGATGAGACGTACTGCGATCCGGCTAGTCTGTTCCATGTCTCTAA<br/> TGATTACTTTTTATCCGCTACTACACCCGCACGCTGTATCAATTCCAGTTCCAAGAAGCTCTC<br/> TGTCAGGCTGCCAAGCACGAAGGACCGCTGCACAAATGCGACATTAGCAATTCTACAGAGGCGG<br/> GTCAGAAGTTGTTCAATATGCTTAGACTGGGGAAGAGCGAACCCTGGACGCTCGCTTTGGAGAA<br/> CGTTGTTGGAGCTAAGAATATGAACGTCAGGCCCTTGTGAATTACTTTGAACCTCTGTTTACG<br/> TGTTTGAAGACCAAATAAAAACTCCTTTGTTGGGTGGAGTACTGACTGGTCCCCCTATGCC</p>                                                                                                                                                                                                                                                                                                                                                                                                                                                                                                                                                                                                                                                                                                                                                                                              |
| 278 | <p>CAATCTACCATCGAAGAGCAGGCCAAAACATTCTCGACAAGTTTAATGTCGAGGCTGAAGACC<br/> TTTTCTACCAATCAAGTCTGGCTAGCTGGAATTACAATACAAACATTACAGAGGAGAACGTACA<br/> AAACATGAATAACGCAGGGGACAAGTGGAGCGCATTCTTAAGGAACAAAGTACCCTTGCGCAA<br/> ATGTATCCGCTGCAAGAGATTCAACAACCTGACGGTTAAGCTGCAACTTCAGGCCCTCCAACAAA<br/> ATGGATCCTCAGTCTTGTGAGAAGACAAAAGCAAGCGACTGAACACCATCCTTAACACCATGTC<br/> AACCATATATTCAACAGGTAAAGTTTGAATCCGGATAACCCCAAGAATGTTTGCTTCTTGAA<br/> CCCGGTCTCAACGAAATTATGGCCAACAGTCTTGATTACAACGAGCGATTGTGGGCATGGGAAA<br/> GTTGGAGGAGTGGGTAGGCAAACAGTTGAGACCTCTTTATGAAGAGTACGTTGTCCTTAAAAA<br/> TGAAATGGCTCGCGCGAATCATTATGAAGACTATGGTACTACTGGAGGGGGGATTATGAGGTG<br/> AACGGGGTGGACGGATACGATTACTCTAGGGGCCAGCTGATAGAGGATGTCGAGCACACCTTTG<br/> AGGAGATTAAGCCGTTGTACGAACATTTGCACGCCTATGTCAGGGCTAAGCTCATGAACGCTTA<br/> TCCGAGTTATATCTCCCCGATAGGATGCTTGCCTGCTCACTTGTTGGGCGATATGTGGGGACGC<br/> TTTTGGACCAACTTGTATTCCCTTACGGTACCGTTCGGCCAGAAACCAAATATCGACGTGACAG<br/> ACGCAATGGTGGATCAAGCATGGGATGCGCAACGAATCTTCAAGGAGGCAGAAAAATTTTTCGT<br/> TTCAGTTGGACTCCCAAACATGACGCAGGGTTTCTGGGAGAACTCAATGTTGACAGATCCAGGT<br/> AATGTGCAGAAAGCGGTTTGGCCACCCTACTGCATGGGATCTTGGTAAAGGGGACTTCCGCATAC<br/> TCATGTGTACGAAAGTAACTATGGACGACTTTCTTACTGCGCACCACGAGATGGGGCACATACA<br/> ATACGATATGGCGTACGCAGCTCAACCTTTCCTTCTGCGGAACGGGGCGAATGAAGGATTTTAC<br/> GAGGCAGTGGGTGAGATTATGTCCCTGTCAGCTGCCACTCCGAAACATCTGAAAAGCATCGGCC<br/> TGTTGAGCCCAGACTTCCAAGAAGATAATGAGACCGAAATAAACTTCTTCTGAAGCAAGCACT<br/> GACTATTGTAGGTACCTTGCCCTTTACATACATGCTGGAGAAGTGGAGGTGGATGGTATTTAAG<br/> GGGGAGATACCGAAAGATCAATGGATGAAAAAGTGGTGGGAAATGAAAAGGGAGATCGTTGGCG<br/> TAGTTGAACCAGTACCGCATGATGAGACGTACTGCGATCCGGCTAGTCTGTTCCATGTCTCTAA<br/> TGATTACTTTTTATCCGCTACTACACCCGCACGCTGTATCAATTCCAGTTCCAAGAAGCTCTC<br/> TGTCAGGCTGCCAAGCACGAAGGACCGCTGCACAAATGCGACATTAGCAATTCTACAGAGGCGG<br/> GTCAGAAGTTGTTCAATATGCTTAGACTGGGGAAGAGCGAACCCTGGACGCTCGCTTTGGAGAA<br/> CGTTGTTGGAGCTAAGAATATGAACGTCAGGCCCTTGTGAATTACTTTGAACCTCTGTTTACG<br/> TGTTTGAAGACCAAATAAAAACTCCTTTGTTGGGTGGAGTACTGACTGGTCCCCCTATGCC</p> |
| 292 | <p>CAATCTACCATCGAAGAGCAGGCCAAAACATTCTCGACAAGTTTAATGTCGAGGCTGAAGACC<br/> TTTTCTACCAATCAAGTCTGGCTAGCTGGAATTACAATACAAACATTACAGAGGAGAACGTACA</p>                                                                                                                                                                                                                                                                                                                                                                                                                                                                                                                                                                                                                                                                                                                                                                                                                                                                                                                                                                                                                                                                                                                                                                                                                                                                                                                                                                                                                                                                                                                                                                                                                                                                                                                                                                                                                                                                                    |

|     |                                                                                                                                                                                                                                                                                                                                                                                                                                                                                                                                                                                                                                                                                                                                                                                                                                                                                                                                                                                                                                                                                                                                                                                                                                                                                                                                                                                                                                                                                                                                                                                                                                                                                                                                                                                                                                                                                                                                                                                                                                                                                                                                                                                                                                                   |
|-----|---------------------------------------------------------------------------------------------------------------------------------------------------------------------------------------------------------------------------------------------------------------------------------------------------------------------------------------------------------------------------------------------------------------------------------------------------------------------------------------------------------------------------------------------------------------------------------------------------------------------------------------------------------------------------------------------------------------------------------------------------------------------------------------------------------------------------------------------------------------------------------------------------------------------------------------------------------------------------------------------------------------------------------------------------------------------------------------------------------------------------------------------------------------------------------------------------------------------------------------------------------------------------------------------------------------------------------------------------------------------------------------------------------------------------------------------------------------------------------------------------------------------------------------------------------------------------------------------------------------------------------------------------------------------------------------------------------------------------------------------------------------------------------------------------------------------------------------------------------------------------------------------------------------------------------------------------------------------------------------------------------------------------------------------------------------------------------------------------------------------------------------------------------------------------------------------------------------------------------------------------|
|     | AAACATGAATAACGCAGGGGACAAGTGGAGCGCATTCCCTTAAGGAACAAAGTACCCTTGCGCAA<br>ATGTATCCGCTGCAAGAGATTCAACAACCTGACGGTTAAGCTGCAACTTCAGGCCCTCCAACAAA<br>ATGGATCCTCAGTCTTGTGAGAAGACAAAAGCAAGCGACTGAACACCATCCTTAACACCATGTC<br>AACCATATATTCAACAGGTAAAGTTTGCAATCCGGATAACCCCAAGAATGTTTGCTTCTTGAA<br>CCCGGTCTCAACGAAATTATGGCCAACAGTCTTGATTACAACGAGCGATTGTGGGCATGGGAAA<br>GTTGGAGGAGTGAGGTAGGCAAACAGTTGAGACCTCTTTATGAAGAGTACGTTGTCCTTAAAAA<br>TGAAATGGCTCGCGCGAATCATTATGAAGACTATGGTGACTACTGGAGGGGGGATTATGAGGTG<br>AACGGGGTGGACGGATACGATTACTCTAGGGGCCAGCTGATAGAGGATGTCGAGCACACCTTTG<br>AGGAGATTAAGCCGTTGTACGAACATTTGCACGCCTATGTCAGGGCTAAGCTCATGAACGCTTA<br>TCCGAGTTATATCTCCCCGATAGGATGCTTGCCTGCTCACTTGTTGGGCGATATGTGGGGACGC<br>TTTTGGACCAACTTGTATTCCCTTACGGTACCGTTCGGCCAGAAACCAATATCGACGTGACAG<br>ACGCAATGGTGGATCAAGCATGGGATGCGCAACGAATCTTCAAGGAGGCAGAAAAATTTTTTCGT<br>TTCAGTTGGACTCCCAAACATGACGCAGGGTTTCTGGGAGAACTCAATGTTGACAGATCCAGGT<br>AATGTGCAGAAAGCGGTTTGCCACCCTACTGCATGGGATCTTGGTAAAGGGGACTTCCGCATAC<br>TCATGTGTACGAAAGTAACTATGGACGACTTTCTTACTGCGCACCACGAGATGGGGCACATACA<br>ATACGATATGGCGTACGCAGCTCAACCTTCTCTTCTGCGGAACGGGGCGAATGAAGGATTTTAC<br>GAGGCAGTGGGTGAGATTATGTCCCTGTGAGTGCCTACTCCGAAACATCTGAAAAGCATCGGCC<br>TGTTGAGCCCAGACTTCCAAGAAGATAATGAGACCGAAATAAACTTCTTCTGAAGCAAGCACT<br>GACTATTGTAGGTACCTTGCCCTTACATACATGCTGGAGAAGTGGAGGTGGATGGTATTTAAG<br>GGGAGATACCGAAAGATCAATGGATGAAAAAGTGGTGGGAAATGAAAAGGGAGATCGTTGGCG<br>TAGTTGAACCAGTACCGCATGATGAGACGTACTGCGATCCGGCTAGTCTGTTCCATGTCTCTAA<br>TGATTACTCTTTCATCCGCTACTACACCCGCACGCTGTATCAATTCCAGTTCCAAGAAGCTCTC<br>TGTCAGGCTGCCAAGCACGAAGGACCGCTGCACAAATGCGACATTAGCAATTCTACAGAGGCGG<br>GTCAGAAGTTGTTCAATATGCTTAGACTGGGAAGAGCGAACCCTGGACGCTCGCTTTGGAGAA<br>CGTTGTTGGAGCTAAGAATATGAACGTCAGGCCCTTGTGAATTACTTTGAACCTCTGTTTACG<br>TGGTTGAAAGACCAAAATAAAAACTCCTTTGTTGGGTGGAGTACTGACTGGTCCCCCTATGCGG<br>ACCAAAGCATCAAAGTGAGGATAAGCCTAAAATCAGCTCTTGGAGATAAAGCATATGAATGGAA<br>CGACAATGAAATGTACCTGTTCCGATCATCTGTTGCATATGCTATGAGGCAGTACTTTTTAAAA<br>GTA AAAAATCAGATGATTCTTTTTGGGGAGGAGGATGTGCGAGTGGCTAATTTGAAACCAAGAA<br>TCTCCTTTAATTTCTTTGTCACTGCACCTAAAAATGTGTCTGATATCATTCTAGAACTGAAGT<br>TGAAAAGGCCATCAGGATGTCCCGGAGCCGTATCAATGATGCTTTCCTGTGAATGACAACAGC<br>CTAGAGTTTCTGGGGATACAGCCAACACTTGGACCTCCTAACCAGCCCCCTGTTTTCC |
| 310 | CAATCTACCATCGAAGAGCAGGTTAAATATTTCCCTCGACAAGTTTAATGCTGAGGCTGAAGACC<br>TTGATTACCAATCAAGTCTGGCTAGCTGGAATTACAATACAAACATTACAGAGGAGAACGTACA<br>AAACATGAATAACGCAGGGGACAAGTGGAGCGCATTCCCTTAAGGAACAAAGTACCCTTGCGCAA<br>ATGTATCCGCTGCAAGAGATTCAAAACCTGACGGTTAAGCTGCAACTTCAGGCCCTCCAACAAA<br>ATGGATCCTCAGTCTTGTGAGAAGACAAAAGCAAGCGACTGAACACCATCCTTAACACCATGTC<br>AACCATATATTCAACAGGTAAAGTTTGCAATCCGGATAACCCCAAGAATGTTTGCTTCTTGAA<br>CCCGGTCTCAACGAAATTATGGCCAACAGTCTTGATTACAACGAGCGATTGTGGGCATGGGAAA<br>GTTGGAGGAGTGAGGTAGGCAAACAGTTGAGACCTCTTTATGAAGAGTACGTTGTCCTTAAAAA<br>TGAAATGGCTCGCGCGAATCATTATGAAGACTATGGTGACTACTGGAGGGGGGATTATGAGGTG<br>AACGGGGTGGACGGATACGATTACTCTAGGGGCCAGCTGATAGAGGATGTCGAGCACACCTTTG<br>AGGAGATTAAGCCGTTGTACGAACATTTGCACGCCTATGTCAGGGCTAAGCTCATGAACGCTTA<br>TCCGAGTTATATCTCCCCGATAGGATGCTTGCCTGCTCACTTGTTGGGCGATATGTGGGGACGC<br>TTTTGGACCAACTTGTATTCCCTTACGGTACCGTTCGGCCAGAAACCAATATCGACGTGACAG<br>ACGCAATGGTGGATCAAGCATGGGATGCGCAACGAATCTTCAAGGAGGCAGAAAAATTTTTTCGT<br>TTCAGTTGGACTCCCAAACATGACGCAGGGTTTCTGGGAGAACTCAATGTTGACAGATCCAGGT                                                                                                                                                                                                                                                                                                                                                                                                                                                                                                                                                                                                                                                                                                                                                                                                                                                                                                                                                                                                                                                                                                                                                                                         |



|     |                                                                                                                                                                                                                                                                                                                                                                                                                                                                                                                                                                                                                                                                                                                                                                                                                                                                                                                                                                                                                                                                                                                                                                                                                                                                                                                                                                                                                                                                                                                                                                                                                                                                                                                                                                                                                                                                                                                                                                                                                                      |
|-----|--------------------------------------------------------------------------------------------------------------------------------------------------------------------------------------------------------------------------------------------------------------------------------------------------------------------------------------------------------------------------------------------------------------------------------------------------------------------------------------------------------------------------------------------------------------------------------------------------------------------------------------------------------------------------------------------------------------------------------------------------------------------------------------------------------------------------------------------------------------------------------------------------------------------------------------------------------------------------------------------------------------------------------------------------------------------------------------------------------------------------------------------------------------------------------------------------------------------------------------------------------------------------------------------------------------------------------------------------------------------------------------------------------------------------------------------------------------------------------------------------------------------------------------------------------------------------------------------------------------------------------------------------------------------------------------------------------------------------------------------------------------------------------------------------------------------------------------------------------------------------------------------------------------------------------------------------------------------------------------------------------------------------------------|
|     | <p>AATGTGCAGAAAGCGGTTTGCCTCCCTACTGCATGGGATCTTGGTAAAGGGGACTTCCGCATAC<br/> TCATGTGTACGAAAGTAACTATGGACGACTTTCTTACTGCGCACCACGAGATGGGGCACATACA<br/> ATACGATATGGCGTACGCAGCTCAACCTTTCTTCTGCGGAACGGGGCGAATGAAGGATTTAC<br/> GAGGCAGTGGGTGAGATTATGTCCCTGTCAGCTGCCACTCCGAAACATCTGAAAAGCATCGGCC<br/> TGTTGAGCCCAGACTTCCAAGAAGATAATGAGACCGAAATAAACTTCCCTTCTGAAGCAAGCACT<br/> GACTATTGTAGGTACCTTGCCCTTTACATACATGCTGGAGAAGTGGAGGTGGATGGTATTTAAG<br/> GGGGAGATACCGAAAGATCAATGGATGAAAAAGTGGTGGGAAATGAAAAGGGAGATCGTTGGCG<br/> TAGTTGAACCAGTACCGCATGATGAGACGTACTGCGATCCGGCTAGTCTGTTCCATGTCTCTAA<br/> TGATTACTCTTTCATCCGCTACTACACCCGCACGCTGTATCAATTCCAGTTCCAAGAAGCTCTC<br/> TGTCAGGCTGCCAAGCACGAAGGACCGCTGCACAAATGCGACATTAGCAATTCTACAGAGGCGG<br/> GTCAGAAGTTGTTCAATATGCTTAGACTGGGGAAGAGCGAACCCTGGACGCTCGCTTTGGAGAA<br/> CGTTGTTGGAGCTAAGAATATGAACGTCAGGCCCTTGCTGAATTACTTTGAACCTCTGTTTACG<br/> TGGTTGAAAGACCAAAAATAAAAACCTCTTTGTTGGGTGGAGTACTGACTGGTCCCCCTATGCGG<br/> ACCAAAGCATCAAAGTGAGGATAAGCCTAAAATCAGCTCTTGGAGATAAAGCATATGAATGGAA<br/> CGACAATGAAATGTACCTGTTCCGATCATCTGTTGCATATGCTATGAGGCAGTACTTTTTTAAAA<br/> GTA AAAAATCAGATGATTCTTTTTGGGGAGGAGGATGTGCGAGTGGCTAATTTGAAACCAAGAA<br/> TCTCCTTTAATTTCTTTGTCACTGCACCTAAAATGTGTCTGATATCATTCTAGAACTGAAGT<br/> TGAAAAGGCCATCAGGATGTCCCGGAGCCGTATCAATGATGCTTTCGCTGAATGACAACAGC<br/> CTAGAGTTTCTGGGGATACAGCCAACACTTGGACCTCCTAACCAGCCCCCTGTTTCC</p>                                                                                                                                                                                                                                                                                                                                                                                                                                                                                                                                                                                                                                                           |
| 311 | <p>CAATCTACCATCGAAGAGCAGGCCAAAACATTCCTCGACTATTTTAATCACGAGGCTGAAGACC<br/> TTTTCTACCAATCAAGTCTGGCTAGCTGGAATTACAATACAAACATTACAGAGGAGAACGTACA<br/> AAACATGAATAACGCAGGGGACAAGGTTAGCGCATTCCCTTAAGGAACAAAGTACCACTGCGCAA<br/> ATGTATCCGCTGCAAGAGATTCAAACCCAACGGTTAAGCTGCAACTTCAGGCCCTCCAACAAA<br/> ATGGATCCTCAGTCTTGTGAGAAGACAAAAGCAAGCGACTGAACACCATCCTTAACACCATGTC<br/> AACCATATATTCAACAGGTAAAGTTTGAATCCGGATAACCCCAAGAATGTTTGCTTCTTGAA<br/> CCCGGTCTCAACGAAATTATGGCCAACAGTCTTGATTACAACGAGCGATTGTGGGCATGGGAAA<br/> GTTGGAGGAGTGAGGTAGGCAAACAGTTGAGACCTCTTTATGAAGAGTACGTTGTCCTTAAAAA<br/> TGAAATGGCTCGCGCGAATCATTATGAAGACTATGGTGACTACTGGAGGGGGGATTATGAGGTG<br/> AACGGGTGGACGGATACGATTACTCTAGGGGCCAGCTGATAGAGGATGTCGAGCACACCTTGG<br/> AGGAGATTAAGCCGTTGTACGAACATTTGCACGCCTATGTCAGGGCTAAGCTCATGAACGCTTA<br/> TCCGAGTTATATCTCCCCGATAGGATGCTTGCCTGCTCACTTGTTGGGCGATATGTGGGGACGC<br/> TTTTGGACCAACTTGATTCCCTTACGGTACCGTTCCGCCAGAAACCAATATCGACGTGACAG<br/> ACGCAATGGTGGATCAAGCATGGGATGCGCAACGAATCTTCAAGGAGGCAGAAAAATTTTTCGT<br/> TTCAGTTGGACTCCCAAACATGACGCAGGGTTTCTGGGAGAACTCAATGTTGACAGATCCAGGT<br/> AATGTGCAGAAAGCGGTTTGCCTCCCTACTGCATGGGATCTTGGTAAAGGGGACTTCCGCATAC<br/> TCATGTGTACGAAAGTAACTATGGACGACTTTCTTACTGCGCACCACGAGATGGGGCACATACA<br/> ATACGATATGGCGTACGCAGCTCAACCTTTCTTCTGCGGAACGGGGCGAATGAAGGATTTAC<br/> GAGGCAGTGGGTGAGATTATGTCCCTGTCAGCTGCCACTCCGAAACATCTGAAAAGCATCGGCC<br/> TGTTGAGCCCAGACTTCCAAGAAGATAATGAGACCGAAATAAACTTCCCTTCTGAAGCAAGCACT<br/> GACTATTGTAGGTACCTTGCCCTTTACATACATGCTGGAGAAGTGGAGGTGGATGGTATTTAAG<br/> GGGGAGATACCGAAAGATCAATGGATGAAAAAGTGGTGGGAAATGAAAAGGGAGATCGTTGGCG<br/> TAGTTGAACCAGTACCGCATGATGAGACGTACTGCGATCCGGCTAGTCTGTTCCATGTCTCTAA<br/> TGATTACTCTTTCATCCGCTACTACACCCGCACGCTGTATCAATTCCAGTTCCAAGAAGCTCTC<br/> TGTCAGGCTGCCAAGCACGAAGGACCGCTGCACAAATGCGACATTAGCAATTCTACAGAGGCGG<br/> GTCAGAAGTTGTTCAATATGCTTAGACTGGGGAAGAGCGAACCCTGGACGCTCGCTTTGGAGAA<br/> CGTTGTTGGAGCTAAGAATATGAACGTCAGGCCCTTGCTGAATTACTTTGAACCTCTGTTTACG<br/> TGGTTGAAAGACCAAAAATAAAAACCTCTTTGTTGGGTGGAGTACTGACTGGTCCCCCTATGCGG</p> |

|     |                                                                                                                                                                                                                                                                                                                                                                                                                                                                                                                                                                                                                                                                                                                                                                                                                                                                                                                                                                                                                                                                                                                                                                                                                                                                                                                                                                                                                                                                                                                                                                                                                                                                                                                                                                                                                                                                                                                                                                                                                                                                                                                                                                                                                                                                                                                                                                                                                                                                    |
|-----|--------------------------------------------------------------------------------------------------------------------------------------------------------------------------------------------------------------------------------------------------------------------------------------------------------------------------------------------------------------------------------------------------------------------------------------------------------------------------------------------------------------------------------------------------------------------------------------------------------------------------------------------------------------------------------------------------------------------------------------------------------------------------------------------------------------------------------------------------------------------------------------------------------------------------------------------------------------------------------------------------------------------------------------------------------------------------------------------------------------------------------------------------------------------------------------------------------------------------------------------------------------------------------------------------------------------------------------------------------------------------------------------------------------------------------------------------------------------------------------------------------------------------------------------------------------------------------------------------------------------------------------------------------------------------------------------------------------------------------------------------------------------------------------------------------------------------------------------------------------------------------------------------------------------------------------------------------------------------------------------------------------------------------------------------------------------------------------------------------------------------------------------------------------------------------------------------------------------------------------------------------------------------------------------------------------------------------------------------------------------------------------------------------------------------------------------------------------------|
|     | <p>ACCAAAGCATCAAAGTGAGGATAAGCCTAAAATCAGCTCTTGGAGATAAAGCATATGAATGGAA<br/> CGACAATGAAATGTACCTGTTCCGATCATCTGTTGCATATGCTATGAGGCAGTACTTTTTAAAA<br/> GTAAAAAATCAGATGATTCTTTTTGGGGAGGAGGATGTGCGAGTGGCTAATTTGAAACCAAGAA<br/> TCTCCTTTAATTTCTTTGTCACTGCACCTAAAAATGTGTCTGATATCATTCTAGAACTGAAGT<br/> TGAAAAGGCCATCAGGATGTCCCGGAGCCGTATCAATGATGCTTTCCGTCTGAATGACAACAGC<br/> CTAGAGTTTCTGGGGATACAGCCAACACTTGGACCTCCTAACCAGCCCCCTGTTTCC</p>                                                                                                                                                                                                                                                                                                                                                                                                                                                                                                                                                                                                                                                                                                                                                                                                                                                                                                                                                                                                                                                                                                                                                                                                                                                                                                                                                                                                                                                                                                                                                                                                                                                                                                                                                                                                                                                                                                                                                                                                                                      |
| 312 | <p>CAATCTACCATCGAAGAGCAGGCCAAAATATTTCTCGACAAGTTTAATGCTGAGGCTGAAGACC<br/> TTTTCTACCAATCAAGTCTGGCTAGCTGGAATTACAATACAAACATTACAGAGGAGAACGTACA<br/> AAACATGAATAACGCAGGGGACAAGTGGAGCGCATTCTTAAGGAACAAAGTACCCTTGCGCAA<br/> ATGTATCCGCTGCAAGAGATTCAACAACCTGACGGTTAAGCTGCAACTTCAGGCCCTCCAACAAA<br/> ATGGATCCTCAGTCTTGTGAGAAGACAAAAGCAAGCGACTGAACACCATCCTTAACACCATGTC<br/> AACCATATATTCAACAGGTAAAGTTTGCAATCCGGATAACCCCAAGAATGTTTGCTTCTTGAA<br/> CCCGGTCTCAACGAAATTATGGCCAACAGTCTTGATTACAACGAGCGATTGTGGGCATGGGAAA<br/> GTTGGAGGAGTGAGGTAGGCCAAACAGTTGAGACCTCTTTATGAAGAGTACGTTGTCCTTAAAAA<br/> TGAAATGGCTCGCGCGAATCATTATGAAGACTATGGTGACTACTGGAGGGGGGATTATGAGGTG<br/> AACGGGGTGGACGGATACGATTACTCTAGGGGCCAGCTGATAGAGGATGTCGAGCACACCTTTG<br/> AGGAGATTAAGCCGTTGTACGAACATTTGCACGCCTATGTCAGGGCTAAGCTCATGAACGCTTA<br/> TCCGAGTTATATCTCCCCGATAGGATGCTTGCCTGCTCACTTGTTGGGCGATATGTGGGGACGC<br/> TTTTGGACCAACTTGTATTCCCTTACGGTACCGTTCGGCCAGAAACCAATATCGACGTGACAG<br/> ACGCAATGGTGGATCAAGCATGGGATGCGCAACGAATCTTCAAGGAGGCAGAAAAATTTTTCGT<br/> TTCAGTTGGACTCCCAAACATGACGCAGGGTTTCTGGGAGAACTCAATGTTGACAGATCCAGGT<br/> AATGTGCAGAAAGCGGTTTGCCTCCCTACTGCATGGGATCTTGGTAAAGGGGACTTCCGCATAC<br/> TCATGTGTACGAAAGTAACTATGGACGACTTTCTTACTGCGCACCACGAGATGGGGCACATACA<br/> ATACGATATGGCGTACGCAGCTCAACCTTCTCTTCTGCGGAACGGGGCGAATGAAGGATTTTAC<br/> GAGGCAGTGGGTGAGATTATGTCCCTGTCAGCTGCCACTCCGAAACATCTGAAAAGCATCGGCC<br/> TGTTGAGCCCAGACTTCCAAGAAGATAATGAGACCGAAATAAACTTCTTCTGAAGCAAGCACT<br/> GACTATTGTAGGTACCTTGCCCTTACATACATGCTGGAGAAGTGGAGGTGGATGGTATTTAAG<br/> GGGGAGATACCGAAAGATCAATGGATGAAAAAGTGGTGGGAAATGAAAAGGGAGATCGTTGGCG<br/> TAGTTGAACCAGTACCGCATGATGAGACGTACTGCGATCCGGCTAGTCTGTTCCATGTCTCTAA<br/> TGATTACTCTTTCATCCGCTACTACACCCGCACGCTGTATCAATTCCAGTTCCAAGAAGCTCTC<br/> TGTCAGGCTGCCAAGCACGAAGGACCGCTGCACAAATGCGACATTAGCAATTCTACAGAGGCGG<br/> GTCAGAAGTTGTTCAATATGCTTAGACTGGGGAAGAGCGAACCCTGGACGCTCGCTTTGGAGAA<br/> CGTTGTTGGAGCTAAGAATATGAACGTCAGGCCCTTGTGAATTACTTTGAACCTCTGTTTACG<br/> TGGTTGAAAGACCAAAAATAAAAACCTCTTTGTTGGGTGGAGTACTGACTGGTCCCCCTATGCGG<br/> ACCAAAGCATCAAAGTGAGGATAAGCCTAAAATCAGCTCTTGGAGATAAAGCATATGAATGGAA<br/> CGACAATGAAATGTACCTGTTCCGATCATCTGTTGCATATGCTATGAGGCAGTACTTTTTAAAA<br/> GTAAAAAATCAGATGATTCTTTTTGGGGAGGAGGATGTGCGAGTGGCTAATTTGAAACCAAGAA<br/> TCTCCTTTAATTTCTTTGTCACTGCACCTAAAAATGTGTCTGATATCATTCTAGAACTGAAGT<br/> TGAAAAGGCCATCAGGATGTCCCGGAGCCGTATCAATGATGCTTTCCGTCTGAATGACAACAGC<br/> CTAGAGTTTCTGGGGATACAGCCAACACTTGGACCTCCTAACCAGCCCCCTGTTTCC</p> |
| 313 | <p>CAATCTACCATCGAAGAGCAGGCCAAAACATTCTCGACTTCTTTGATAGCCAGGCTGAAGACC<br/> TTTTCTACCAATCAAGTCTGGCTAGCTGGAATTACAATACAAACATTACAGAGGAGAACGTACA<br/> AAACATGAATAACGCAGGGGACAAGTGGAGCGCATTCTTAAGGAACAAAGTACCCTTGCGCAA<br/> ATGTATCCGCTGCAAGAGATTCAAAACCTGACGGTTAAGCTGCAACTTCAGGCCCTCCAACAAA<br/> ATGGATCCTCAGTCTTGTGAGAAGACAAAAGCAAGCGACTGAACACCATCCTTAACACCATGTC<br/> AACCATATATTCAACAGGTAAAGTTTGCAATCCGGATAACCCCAAGAATGTTTGCTTCTTGAA<br/> CCCGGTCTCAACGAAATTATGGCCAACAGTCTTGATTACAACGAGCGATTGTGGGCATGGGAAA</p>                                                                                                                                                                                                                                                                                                                                                                                                                                                                                                                                                                                                                                                                                                                                                                                                                                                                                                                                                                                                                                                                                                                                                                                                                                                                                                                                                                                                                                                                                                                                                                                                                                                                                                                                                                                                                                                                                                                                                           |

|     |                                                                                                                                                                                                                                                                                                                                                                                                                                                                                                                                                                                                                                                                                                                                                                                                                                                                                                                                                                                                                                                                                                                                                                                                                                                                                                                                                                                                                                                                                                                                                                                                                                                                                                                                                                                                                                                                                                                                                           |
|-----|-----------------------------------------------------------------------------------------------------------------------------------------------------------------------------------------------------------------------------------------------------------------------------------------------------------------------------------------------------------------------------------------------------------------------------------------------------------------------------------------------------------------------------------------------------------------------------------------------------------------------------------------------------------------------------------------------------------------------------------------------------------------------------------------------------------------------------------------------------------------------------------------------------------------------------------------------------------------------------------------------------------------------------------------------------------------------------------------------------------------------------------------------------------------------------------------------------------------------------------------------------------------------------------------------------------------------------------------------------------------------------------------------------------------------------------------------------------------------------------------------------------------------------------------------------------------------------------------------------------------------------------------------------------------------------------------------------------------------------------------------------------------------------------------------------------------------------------------------------------------------------------------------------------------------------------------------------------|
|     | <p>GTTGGAGGAGTGAGGTAGGCAAACAGTTGAGACCTCTTTATGAAGAGTACGTTGTCCTTAAAAA<br/> TGAAATGGCTCGCGCGAATCATTATGAAGACTATGGTGACTACTGGAGGGGGGATTATGAGGTG<br/> AACGGGGTGGACGGATACGATTACTCTAGGGGCCAGCTGATAGAGGATGTCGAGCACACCTTTG<br/> AGGAGATTAAGCCGTTGTACGAACATTTGCACGCCTATGTCAGGGCTAAGCTCATGAACGCTTA<br/> TCCGAGTTATATCTCCCCGATAGGATGCTTGCCTGCTCACTTGTGGGGCGATATGTGGGGACGC<br/> TTTTGGACCAACTTGATTCCCTTACGGTACCGTTCGGCCAGAAACCAATATCGACGTGACAG<br/> ACGCAATGGTGGATCAAGCATGGGATGCGCAACGAATCTTCAAGGAGGCAGAAAAATTTTTTCGT<br/> TTCAGTTGGACTCCCAAACATGACGCAGGGTTTCTGGGAGAACTCAATGTTGACAGATCCAGGT<br/> AATGTGCAGAAAGCGGTTTGCCTCCCTACTGCATGGGATCTTGGTAAAGGGGACTTCCGCATAC<br/> TCATGTGTACGAAAGTAACTATGGACGACTTTCTTACTGCGCACCACGAGATGGGGCACATACA<br/> ATACGATATGGCGTACGCAGCTCAACCTTTCCTTCTGCGGAACGGGGCGAATGAAGGATTTTAC<br/> GAGGCAGTGGGTGAGATTATGTCCCTGTCAGCTGCCACTCCGAAACATCTGAAAAGCATCGGCC<br/> TGTTGAGCCCAGACTTCCAAGAAGATAATGAGACCGAAATAAATTCCTTCTGAAGCAAGCACT<br/> GACTATTGTAGGTACCTTGCCCTTTACATACATGCTGGAGAAGTGGAGGTGGATGGTATTTAAG<br/> GGGGAGATAACCGAAAGATCAATGGATGAAAAAGTGGTGGGAAATGAAAAGGGAGATCGTTGGCG<br/> TAGTTGAACCAGTACCGCATGATGAGACGTACTGCGATCCGGCTAGTCTGTTCCATGTCTCTAA<br/> TGATTACTCTTTCATCCGCTACTACACCCGCACGCTGTATCAATTCCAGTTCCAAGAAGCTCTC<br/> TGTCAGGCTGCCAAGCACGAAGGACCGCTGCACAAATGCGACATTAGCAATTCTACAGAGGCGG<br/> GTCAGAAGTTGTTCAATATGCTTAGACTGGGGAAGAGCGAACCGTGGACGCTCGCTTTGGAGAA<br/> CGTTGTTGGAGCTAAGAATATGAACGTCAGGCCCTTGCTGAATTACTTTGAACCTCTGTTTACG<br/> TGGTTGAAAGACCAAAATAAAAATCCTTTGTTGGGTGGAGTACTGACTGGTCCCCCTATGCGG<br/> ACCAAAGCATCAAAGTGAGGATAAGCCTAAAATCAGCTCTTGGAGATAAAGCATATGAATGGAA<br/> CGACAATGAAATGTACCTGTTCCGATCATCTGTTGCATATGCTATGAGGCAGTACTTTTTTAAAA<br/> GTAAAAAATCAGATGATTCTTTTTGGGGAGGAGGATGTGCGAGTGGCTAATTTGAAACCAAGAA<br/> TCTCCTTTAATTTCTTTGTCACTGCACCTAAAATGTGTCTGATATCATTCTAGAACTGAAGT<br/> TGAAAAGGCCATCAGGATGTCCCGGAGCCGTATCAATGATGCTTTCCTGCTGAATGACAACAGC<br/> CTAGAGTTTCTGGGGATACAGCCAACACTTGGACCTCCTAACCAGCCCCCTGTTTCC</p> |
| 353 | <p>CAATCTACCATCGAAGAGCAGGCCAAAGCATTCTCGACTTCTTTGATAGCCAGGCTGAAGACC<br/> TTTTCTACCAATCAAGTCTGGCTAGCTGGAATTACAATACAAACATTACAGAGGAGAACGTACA<br/> AGACATGAATAACGCAGGGGACAGGTGGAGCGCATTCTTAAGGAACAAAGTACCCCTGCGCAA<br/> ATGTATCCGCTGCAAGAGATTCAAACCTGACGGTTAAGCTGCAACTTCAGGCCCTCCAACAAA<br/> ATGGATCCTCAGTCTTGTGAGAAGACAAAAGCAAGCGACTGAACACCATCCTTAACACCATGTC<br/> AACCATATATTCAACAGGTAAAGTTTGAATCCGGATAACCCCAAGAATGTTTGCTTCTTGAA<br/> CCCGGTCTCAACGAAATTATGGCCAACAGTCTTGATTACAACGAGCGATTGTGGGCATGGGAAA<br/> GTTGGAGGAGTGAGGTAGGCAAACAGTTGAGACCTCTTTATGAAGAGTACGTTGTCCTTAAAAA<br/> TGAAATGGCTCGCGCGAATCATTATGAAGACTATGGTGACTACTGGAGGGGGGATTATGAGGTG<br/> AACGGGGTGGACGGATACGATTACTCTAGGGGCCAGCTGATAGAGGATGTCGAGCACACCTTTG<br/> AGGAGATTAAGCCGTTGTACGAACATTTGCACGCCTATGTCAGGGCTAAGCTCATGAACGCTTA<br/> TCCGAGTTATATCTCCCCGATAGGATGCTTGCCTGCTCACTTGTGGGGCGATATGTGGGGACGC<br/> TTTTGGACCAACTTGATTCCCTTACGGTACCGTTCGGCCAGAAACCAATATCGACGTGACAG<br/> ACGCAATGGTGGATCAAGCATGGGATGCGCAACGAATCTTCAAGGAGGCAGAAAAATTTTTTCGT<br/> TTCAGTTGGACTCCCAAACATGACGCAGGGTTTCTGGGAGAACTCAATGTTGACAGATCCAGGT<br/> AATGTGCAGAAAGCGGTTTGCCTCCCTACTGCATGGGATCTTGGTAAAGGGGACTTCCGCATAC<br/> TCATGTGTACGAAAGTAACTATGGACGACTTTCTTACTGCGCACCACGAGATGGGGCACATACA<br/> ATACGATATGGCGTACGCAGCTCAACCTTTCCTTCTGCGGAACGGGGCGAATGAAGGATTTTAC<br/> GAGGCAGTGGGTGAGATTATGTCCCTGTCAGCTGCCACTCCGAAACATCTGAAAAGCATCGGCC<br/> TGTTGAGCCCAGACTTCCAAGAAGATAATGAGACCGAAATAAATTCCTTCTGAAGCAAGCACT</p>                                                                                                                                                                                                                                                                                                                                                                                                                                                                                                        |

|     |                                                                                                                                                                                                                                                                                                                                                                                                                                                                                                                                                                                                                                                                                                                                                                                                                                                                                                                                                                                                                                                                                                                                                                                                                                                                                                                                                                                                                                                                                                                                                                                                                                                                                                                                                                                                                                                                                                                                                                                                                                                                                                                                                                                                                                                                                                                          |
|-----|--------------------------------------------------------------------------------------------------------------------------------------------------------------------------------------------------------------------------------------------------------------------------------------------------------------------------------------------------------------------------------------------------------------------------------------------------------------------------------------------------------------------------------------------------------------------------------------------------------------------------------------------------------------------------------------------------------------------------------------------------------------------------------------------------------------------------------------------------------------------------------------------------------------------------------------------------------------------------------------------------------------------------------------------------------------------------------------------------------------------------------------------------------------------------------------------------------------------------------------------------------------------------------------------------------------------------------------------------------------------------------------------------------------------------------------------------------------------------------------------------------------------------------------------------------------------------------------------------------------------------------------------------------------------------------------------------------------------------------------------------------------------------------------------------------------------------------------------------------------------------------------------------------------------------------------------------------------------------------------------------------------------------------------------------------------------------------------------------------------------------------------------------------------------------------------------------------------------------------------------------------------------------------------------------------------------------|
|     | <p>GACTATTGTAGGTACCTTGCCCTTTACATACATGCTGGAGAAGTGGAGGTGGATGGTATTTAAG<br/> GGGGAGATACCGAAAGATCAATGGATGAAAAAGTGGTGGGAAATGAAAAGGGAGATCGTTGGCG<br/> TAGTTGAACCAGTACCGCATGATGAGACGTACTGCGATCCGGCTAGTCTGTTCCATGTCTCTAA<br/> TGATTACTCTTTCATCCGCTACTACACCCGCACGCTGTATCAATTCCAGTTCCAAGAAGCTCTC<br/> TGTCAGGCTGCCAAGCACGAAGGACCGCTGCACAAATGCGACATTAGCAATTCTACAGAGGCGG<br/> GTCAGAAGTTGTTCAATATGCTTAGACTGGGGAAGAGCGAACCCTGGACGCTCGCTTTGGAGAA<br/> CGTTGTTGGAGCTAAGAATATGAACGTCAGGCCCTTGTGAATTACTTTGAACCTCTGTTTACG<br/> TGGTTGAAAGACCAAATAAAAACTCCTTTGTTGGGTGGAGTACTGACTGGTCCCCCTATGCGG<br/> ACCAAAGCATCAAAGTGAGGATAAGCCTAAAATCAGCTCTTGGAGATAAAGCATATGAATGGAA<br/> CGACAATGAAATGTACCTGTTCCGATCATCTGTTGCATATGCTATGAGGCAGTACTTTTTAAAA<br/> GTA AAAAATCAGATGATTCTTTTTGGGGAGGAGGATGTGCGAGTGGCTAATTTGAAACCAAGAA<br/> TCTCCTTTAATTTCTTTGTCACTGCACCTAAAAATGTGTCTGATATCATTCTAGAACTGAAGT<br/> TGAAAAGGCCATCAGGATGTCCCGGAGCCGTATCAATGATGCTTCCGTCTGAATGACAACAGC<br/> CTAGAGTTTCTGGGGATACAGCCAACACTTGGACCTCCTAACCAGCCCCCTGTTTCC</p>                                                                                                                                                                                                                                                                                                                                                                                                                                                                                                                                                                                                                                                                                                                                                                                                                                                                                                                                                                                                                                                                                                                                                                                                                                                                                                              |
| 354 | <p>CAATCTACCATCGAAGAGCAGGCCAAAACATTCTCGACTTCTTTGATGCCCAGGCTGAAGACC<br/> TTTTCTACCAATCAAGTCTGGCTAGCTGGGATTACAGTACAAGCATTACAGAGGGGAACGTGCA<br/> AAACATGAATGACGCAGGGGACAAGTGGAGCGCATTCTTAAGGAGCAAAGTACCCTTGCGCAA<br/> ATGTATCCGCTGCAAGAGATTCAAACCTGACGGTTAAGCTGCAACTTCAGGCCCTCCAGCAA<br/> ATGGATCCTCAGTCTTGTGAGAAGACAAAAGCAAGCGACTGAACACCATCCTTAACACCATGTC<br/> AACCATATATTCAACAGGTAAGTTTTGCAATCCGGATAACCCCAAGAATGTTTGCTTCTTGAA<br/> CCCGGTCTCAACGAAATTATGGCCAACAGTCTTGATTACAACGAGCGATTGTGGGCATGGGAAA<br/> GTTGGAGGAGTGAGGTAGGCAAACAGTTGAGACCTCTTTATGAAGAGTACGTTGTCCTTAAAAA<br/> TGAAATGGCTCGCGCGAATCATTATGAAGACTATGGTGACTACTGGAGGGGGGATTATGAGGTG<br/> AACGGGGTGGACGGATACGATTACTCTAGGGGCCAGCTGATAGAGGATGTCGAGCACACCTTTG<br/> AGGAGATTAAGCCGTTGTACGAACATTTGCACGCCTATGTCAGGGCTAAGCTCATGAACGCTTA<br/> TCCGAGTTATATCTCCCCGATAGGATGCTTGCCTGCTCACTTGTGGGCGATATGTGGGGACGC<br/> TTTTGGACCAACTTGTATTCCCTTACGGTACCGTTCGGCCAGAAACCAAATATCGACGTGACAG<br/> ACGCAATGGTGGATCAAGCATGGGATGCGCAACGAATCTTCAAGGAGGCAGAAAAATTTTTCGT<br/> TTCAGTTGGACTCCCAAACATGACGCAGGGTTTCTGGGAGA ACTCAATGTTGACAGATCCAGGT<br/> AATGTGCAGAAAGCGGTTTGCCTCCCTACTGCATGGGATCTTGGTAAAGGGGACTTCCGCATAC<br/> TCATGTGTACGAAAGTAACTATGGACGACTTTCTTACTGCGCACCACGAGATGGGGCACATACA<br/> ATACGATATGGCGTACGCAGCTCAACCTTTCTTCTGCGGAACGGGGCGAATGAAGGATTTTAC<br/> GAGGCAGTGGGTGAGATTATGTCCCTGTCAGCTGCCACTCCGAAACATCTGAAAAGCATCGGCC<br/> TGTTGAGCCCAGACTTCCAAGAAGATAATGAGACCGAAATAAACTTCTTCTGAAGCAAGCACT<br/> GACTATTGTAGGTACCTTGCCCTTTACATACATGCTGGAGAAGTGGAGGTGGATGGTATTTAAG<br/> GGGGAGATACCGAAAGATCAATGGATGAAAAAGTGGTGGGAAATGAAAAGGGAGATCGTTGGCG<br/> TAGTTGAACCAGTACCGCATGATGAGACGTACTGCGATCCGGCTAGTCTGTTCCATGTCTCTAA<br/> TGATTACTCTTTCATCCGCTACTACACCCGCACGCTGTATCAATTCCAGTTCCAAGAAGCTCTC<br/> TGTCAGGCTGCCAAGCACGAAGGACCGCTGCACAAATGCGACATTAGCAATTCTACAGAGGCGG<br/> GTCAGAAGTTGTTCAATATGCTTAGACTGGGGAAGAGCGAACCCTGGACGCTCGCTTTGGAGAA<br/> CGTTGTTGGAGCTAAGAATATGAACGTCAGGCCCTTGTGAATTACTTTGAACCTCTGTTTACG<br/> TGGTTGAAAGACCAAATAAAAACTCCTTTGTTGGGTGGAGTACTGACTGGTCCCCCTATGCGG<br/> ACCAAAGCATCAAAGTGAGGATAAGCCTAAAATCAGCTCTTGGAGATAAAGCATATGAATGGAA<br/> CGACAATGAAATGTACCTGTTCCGATCATCTGTTGCATATGCTATGAGGCAGTACTTTTTAAAA<br/> GTA AAAAATCAGATGATTCTTTTTGGGGAGGAGGATGTGCGAGTGGCTAATTTGAAACCAAGAA<br/> TCTCCTTTAATTTCTTTGTCACTGCACCTAAAAATGTGTCTGATATCATTCTAGAACTGAAGT</p> |

|     |                                                                                                                                                                                                                                                                                                                                                                                                                                                                                                                                                                                                                                                                                                                                                                                                                                                                                                                                                                                                                                                                                                                                                                                                                                                                                                                                                                                                                                                                                                                                                                                                                                                                                                                                                                                                                                                                                                                                                                                                                                                                                                                                                                                                                                                                                                                                                                                      |
|-----|--------------------------------------------------------------------------------------------------------------------------------------------------------------------------------------------------------------------------------------------------------------------------------------------------------------------------------------------------------------------------------------------------------------------------------------------------------------------------------------------------------------------------------------------------------------------------------------------------------------------------------------------------------------------------------------------------------------------------------------------------------------------------------------------------------------------------------------------------------------------------------------------------------------------------------------------------------------------------------------------------------------------------------------------------------------------------------------------------------------------------------------------------------------------------------------------------------------------------------------------------------------------------------------------------------------------------------------------------------------------------------------------------------------------------------------------------------------------------------------------------------------------------------------------------------------------------------------------------------------------------------------------------------------------------------------------------------------------------------------------------------------------------------------------------------------------------------------------------------------------------------------------------------------------------------------------------------------------------------------------------------------------------------------------------------------------------------------------------------------------------------------------------------------------------------------------------------------------------------------------------------------------------------------------------------------------------------------------------------------------------------------|
|     | TGAAAAGGCCATCAGGATGTCCCGGAGCCGTATCAATGATGCTTTCCGTCTGAATGACAACAGCCTAGAGTTTCTGGGGATACAGCCAACACTTGGACCTCCTAACCAGCCCCCTGTTTCC                                                                                                                                                                                                                                                                                                                                                                                                                                                                                                                                                                                                                                                                                                                                                                                                                                                                                                                                                                                                                                                                                                                                                                                                                                                                                                                                                                                                                                                                                                                                                                                                                                                                                                                                                                                                                                                                                                                                                                                                                                                                                                                                                                                                                                                            |
| 355 | CAACCAACCATCGAAGAGCAGGCCAAAACATTTCCTCGACAAGTTTAAATCACGAGGCTGAAGACCTTTTCTACTTGTCAAGTCTGGCTAGCTGGAATTACAATACAAACATTACAGAGGAGAACGTACA<br>AAACATGAATAACGCAGGGGACAAGTGGAGCGCATTTCCTTAAGGAACAAAGTACCACTGCGCAA<br>ATGTATCCGCTGCAAGAGATTCAACAGCTGACGGTTAAGCTGCAACTTCAGGCCCTCCAACAAA<br>ATGGATCCTCAGTCTTGTGAGAAGACAAAAGCAAGCGACTGAACACCATCCTTAACACCATGTC<br>AACCATATATTCAACAGGTAAAGTTTGCAATCCGGATAACCCCAAGAATGTTTGCTTCTTGAA<br>CCCGGTCTCAACGAAATTATGGCCAACAGTCTTGATTACAACGAGCGATTGTGGGCATGGGAAA<br>GTTGGAGGAGTGAGGTAGGCAAACAGTTGAGACCTCTTTATGAAGAGTACGTTGTCCTTAAAAA<br>TGAAATGGCTCGCGGAATCATTATGAAGACTATGGTGACTACTGGAGGGGGATTATGAGGTG<br>AACGGGGTGGACGGATACGATTACTCTAGGGGCCAGCTGATAGAGGATGTCGAGCACACCTTTG<br>AGGAGATTAAGCCGTTGTACGAACATTTGCACGCCTATGTCAGGGCTAAGCTCATGAACGCTTA<br>TCCGAGTTATATCTCCCCGATAGGATGCTTGCCTGCTCACTTGTTGGGCGATATGTGGGGACGC<br>TTTTGGACCAACTTGTATTCCCTTACGGTACCGTTCGGCCAGAAACCAATATCGACGTGACAG<br>ACGCAATGGTGGATCAAGCATGGGATGCGCAACGAATCTTCAAGGAGGCAGAAAAATTTTTCGT<br>TTCAGTTGGACTCCCAAACATGACGCAGGGTTTCTGGGAGAACTCAATGTTGACAGATCCAGGT<br>AATGTGCAGAAAGCGGTTTGCCTCCCTACTGCATGGGATCTTGGTAAAGGGGACTTCCGCATAC<br>TCATGTGTACGAAAGTAACTATGGACGACTTTCTTACTGCGCACCACGAGATGGGGCACATACA<br>ATACGATATGGCGTACGCAGCTCAACCTTTCCTTCTGCGGAACGGGGCGAATGAAGGATTTAC<br>GAGGCAGTGGGTGAGATTATGTCCCTGTCAGCTGCCACTCCGAAACATCTGAAAAGCATCGGCC<br>TGTTGAGCCCAGACTTCCAAGAAGATAATGAGACCGAAATAAACTTCTTCTGAAGCAAGCACT<br>GACTATTGTAGGTACCTTGCCCTTACATACATGCTGGAGAAGTGGAGGTGGATGGTATTTAAG<br>GGGGAGATACCGAAAGATCAATGGATGAAAAAGTGGTGGGAAATGAAAAGGGAGATCGTTGGCG<br>TAGTTGAACCAGTACCGCATGATGAGACGTACTGCGATCCGGCTAGTCTGTTCCATGTCTCTAA<br>TGATTACTCTTTCATCCGCTACTACACCCGCACGCTGTATCAATTCCAGTTCCAAGAAGCTCTC<br>TGTCAGGCTGCCAAGCACGAAGGACCGCTGCACAAATGCGACATTAGCAATTCTACAGAGGCGG<br>GTCAGAAGTTGTTCAATATGCTTAGACTGGGGAAGAGCGAACCCTGGACGCTCGCTTTGGAGAA<br>CGTTGTTGGAGCTAAGAATATGAACGTCAGGCCCTTGTGAATTACTTTGAACCTCTGTTTACG<br>TGGTTGAAAGACCAAAAATAAAAACCTCTTTGTTGGGTGGAGTACTGACTGGTCCCCCTATGCGG<br>ACCAAAGCATCAAAGTGAGGATAAGCCTAAAATCAGCTCTTGGAGATAAAGCATATGAATGGAA<br>CGACAATGAAATGTACCTGTTCCGATCATCTGTTGCATATGCTATGAGGCAGTACTTTTTAAAA<br>GTA AAAAATCAGATGATTCTTTTTGGGGAGGAGGATGTGCGAGTGGCTAATTTGAAACCAAGAA<br>TCTCCTTTAATTTCTTTGTCACTGCACCTAAAATGTGTCTGATATCATTCTAGAACTGAAGT<br>TGAAAAGGCCATCAGGATGTCCCGGAGCCGTATCAATGATGCTTTCCGTCTGAATGACAACAGC<br>CTAGAGTTTCTGGGGATACAGCCAACACTTGGACCTCCTAACCAGCCCCCTGTTTCC |
| 373 | CGATCTACCATCGAAGAGCAGGCCAAAACATTTCCTCGACTTCTTTGATAGCCAGGCTGAAGACC<br>TTTTCTACCAATCAAGTCTGGCAAGCTGGAATTACAACACAAACATTACAGAGGAGAACGTACA<br>AAACATGAATAACGCAGGGGACAAGCGGAGCGCATTTCCTTAAGGAACGAAGTACCCTTGCGCAG<br>ATGTATCCGCTGCAAGAGATTCAAAACCTGACGGTTAAGCTGCAACTTCAGGCCCTCCAACAAA<br>ATGGATCCTCAGTCTTGTGAGAAGACAAAAGCAAGCGACTGAACACCATCCTTAACACCATGTC<br>AACCATATATTCAACAGGTAAAGTTTGCAATCCGGATAACCCCAAGAATGTTTGCTTCTTGAA<br>CCCGGTCTCAACGAAATTATGGCCAACAGTCTTGATTACAACGAGCGATTGTGGGCATGGGAAA<br>GTTGGAGGAGTGAGGTAGGCAAACAGTTGAGACCTCTTTATGAAGAGTACGTTGTCCTTAAAAA<br>TGAAATGGCTCGCGGAATCATTATGAAGACTATGGTGACTACTGGAGGGGGATTATGAGGTG<br>AACGGGGTGGACGGATACGATTACTCTAGGGGCCAGCTGATAGAGGATGTCGAGCACACCTTTG<br>AGGAGATTAAGCCGTTGTACGAACATTTGCACGCCTATGTCAGGGCTAAGCTCATGAACGCTTA                                                                                                                                                                                                                                                                                                                                                                                                                                                                                                                                                                                                                                                                                                                                                                                                                                                                                                                                                                                                                                                                                                                                                                                                                                                                                                                                                                                                                                                                                                                                                                                                              |

|     |                                                                                                                                                                                                                                                                                                                                                                                                                                                                                                                                                                                                                                                                                                                                                                                                                                                                                                                                                                                                                                                                                                                                                                                                                                                                                                                                                                                                                                                                                                                                                                                                                                                                                                                                            |
|-----|--------------------------------------------------------------------------------------------------------------------------------------------------------------------------------------------------------------------------------------------------------------------------------------------------------------------------------------------------------------------------------------------------------------------------------------------------------------------------------------------------------------------------------------------------------------------------------------------------------------------------------------------------------------------------------------------------------------------------------------------------------------------------------------------------------------------------------------------------------------------------------------------------------------------------------------------------------------------------------------------------------------------------------------------------------------------------------------------------------------------------------------------------------------------------------------------------------------------------------------------------------------------------------------------------------------------------------------------------------------------------------------------------------------------------------------------------------------------------------------------------------------------------------------------------------------------------------------------------------------------------------------------------------------------------------------------------------------------------------------------|
|     | <p>TCCGAGTTATATCTCCCCGATAGGATGCTTGCCTGCTCACTTGTTGGGCGATATGTGGGGACGC<br/> TTTTGGACCAACTTGTATTCCCTTACGGTACCGTTCGGCCAGAAACCAATATCGACGTGACAG<br/> ACGCAATGGTGGATCAAGCATGGGATGCGCAACGAATCTTCAAGGAGGCAGAAAAATTTTTCGT<br/> TTCAGTTGGACTCCCAAACATGACGCAGGGTTTCTGGGAGAACTCAATGTTGACAGATCCAGGT<br/> AATGTGCAGAAAGCGGTTTGCCTCCCTACTGCATGGGATCTTGGTAAAGGGGACTTCCGCATAC<br/> TCATGTGTACGAAAGTAACTATGGACGACTTTCTTACTGCGCACCACGAGATGGGGCACATACA<br/> ATACGATATGGCGTACGCAGCTCAACCTTTCCTTCTGCGGAACGGGGCGAATGAAGGATTTTCAC<br/> GAGGCAGTGGGTGAGATTATGTCCCTGTCAGCTGCCACTCCGAAACATCTGAAAAGCATCGGCC<br/> TGTTGAGCCCAGACTTCCAAGAAGATAATGAGACCGAAATAAACTTCTTCTGAAGCAAGCACT<br/> GACTATTGTAGGTACCTTGCCCTTACATACATGCTGGAGAAGTGGAGGTGGATGGTATTTAAG<br/> GGGGAGATACCGAAAGATCAATGGATGAAAAAGTGGTGGGAAATGAAAAGGGAGATCGTTGGCG<br/> TAGTTGAACCAGTACCGCATGATGAGACGTACTGCGATCCGGCTAGTCTGTTCCATGTCTCTAA<br/> TGATTACTTTTTCATCCGCTACTACACCCGCACGCTGTATCAATTCCAGTTCCAAGAAGCTCTC<br/> TGTCAGGCTGCCAAGCACGAAGGACCGCTGCACAAATGCGACATTAGCAATTCTACAGAGGCGG<br/> GTCAGAAGTTGTTCAATATGCTTAGACTGGGGAAGAGCGAACCCTGGACGCTCGCTTTGGAGAA<br/> CGTTGTTGGAGCTAAGAATATGAACGTCAGGCCCTTGTGAATTACTTTGAACCTCTGTTTACG<br/> TGGTTGAAAGACCAAAAATAAAAACCTCTTTGTTGGGTGGAGTACTGACTGGTCCCCCTATGCGG<br/> ACCAAAGCATCAAAGTGAGGATAAGCCTAAAATCAGCTCTTGGAGATAAAGCATATGAATGGAA<br/> CGACAATGAAATGTACCTGTTCCGATCATCTGTTGCATATGCTATGAGGCAGTACTTTTTAAAA<br/> GTAAAAAATCAGATGATTCTTTTTGGGGAGGAGGATGTGCGAGTGGCTAATTTGAAACCAAGAA<br/> TCTCCTTTAATTTCTTTGTCACTGCACCTAAAATGTGTCTGATATCATTCTAGAACTGAAGT<br/> TGAAAAGGCCATCAGGATGTCCCGGAGCCGTATCAATGATGCTTTCCTGCTGAATGACAACAGC<br/> CTAGAGTTTCTGGGGATACAGCCAACACTTGGACCTCCTAACCAGCCCCCTGTTTCC</p>                                                                           |
| 375 | <p>CAACCTACCATCGAAGAGCAGGCCAAAACATTCCTCGACAAGTTTAGTGTCGAGGCTGAAGACC<br/> TTCTCTACCAATCAAGTCTGGCTAGCTGGGATTACAACACAAACATTACAGAGGAGAACGTACA<br/> AAACATGAATAACGCAGGGGACAAATGGAGCGCATTCTCAAGGAACAAAGTACCCTTGCGCAA<br/> ATGTATCCGCTGCAAGAGATTCAAACCTGACGGTTAAGCTGCAACTTCAGGCCCCCCAACAAA<br/> ATGGATCCTCAGTCTTGTGAGAAGACAAAAGCAAGCGACTGAACACCATCCTTAACACCATGTC<br/> AACCATATATTCAACAGGTAAAGTTTGCAATCCGGATAACCCCAAGAATGTTTGCTTCTTGAA<br/> CCCGGTCTCAACGAAATTATGGCCAACAGTCTTGATTACAACGAGCGATTGTGGGCATGGGAAA<br/> GTTGGAGGAGTGAGGTAGGCAAACAGTTGAGACCTCTTTATGAAGAGTACGTTGTCCTTAAAAA<br/> TGAAATGGCTCGCGCGAATCATTATGAAGACTATGGTGACTACTGGAGGGGGATTATGAGGTG<br/> AACGGGGTGGACGGATACGATTACTCTAGGGGCCAGCTGATAGAGGATGTCGAGCACACCTTG<br/> AGGAGATTAAGCCGTTGTACGAACATTTGCACGCCTATGTCAGGGCTAAGCTCATGAACGCTTA<br/> TCCGAGTTATATCTCCCCGATAGGATGCTTGCCTGCTCACTTGTTGGGCGATATGTGGGGACGC<br/> TTTTGGACCAACTTGTATTCCCTTACGGTACCGTTCGGCCAGAAACCAATATCGACGTGACAG<br/> ACGCAATGGTGGATCAAGCATGGGATGCGCAACGAATCTTCAAGGAGGCAGAAAAATTTTTCGT<br/> TTCAGTTGGACTCCCAAACATGACGCAGGGTTTCTGGGAGAACTCAATGTTGACAGATCCAGGT<br/> AATGTGCAGAAAGCGGTTTGCCTCCCTACTGCATGGGATCTTGGTAAAGGGGACTTCCGCATAC<br/> TCATGTGTACGAAAGTAACTATGGACGACTTTCTTACTGCGCACCACGAGATGGGGCACATACA<br/> ATACGATATGGCGTACGCAGCTCAACCTTTCCTTCTGCGGAACGGGGCGAATGAAGGATTTTCAC<br/> GAGGCAGTGGGTGAGATTATGTCCCTGTCAGCTGCCACTCCGAAACATCTGAAAAGCATCGGCC<br/> TGTTGAGCCCAGACTTCCAAGAAGATAATGAGACCGAAATAAACTTCTTCTGAAGCAAGCACT<br/> GACTATTGTAGGTACCTTGCCCTTACATACATGCTGGAGAAGTGGAGGTGGATGGTATTTAAG<br/> GGGGAGATACCGAAAGATCAATGGATGAAAAAGTGGTGGGAAATGAAAAGGGAGATCGTTGGCG<br/> TAGTTGAACCAGTACCGCATGATGAGACGTACTGCGATCCGGCTAGTCTGTTCCATGTCTCTAA<br/> TGATTACTTTTTCATCCGCTACTACACCCGCACGCTGTATCAATTCCAGTTCCAAGAAGCTCTC</p> |

|                                                                                                                                                                                                                                                                                                                                                                                                                                                                                                                                                                                                                                                                                                  |
|--------------------------------------------------------------------------------------------------------------------------------------------------------------------------------------------------------------------------------------------------------------------------------------------------------------------------------------------------------------------------------------------------------------------------------------------------------------------------------------------------------------------------------------------------------------------------------------------------------------------------------------------------------------------------------------------------|
| TGTCAGGCTGCCAAGCACGAAGGACCGCTGCACAAATGCGACATTAGCAATTCTACAGAGGCGG<br>GTCAGAAGTTGTTCAATATGCTTAGACTGGGGAAGAGCGAACCGTGGACGCTCGCTTTGGAGAA<br>CGTTGTTGGAGCTAAGAATATGAACGTCAGGCCCTTGCTGAATTACTIONTTGAACCTCTGTTTACG<br>TGGTTGAAAGACCAAAAATAAAAACCTCCTTTGTTGGGTGGAGTACTGACTGGTCCCCCTATGCGG<br>ACCAAAGCATCAAAGTGAGGATAAGCCTAAAATCAGCTCTTGGAGATAAAGCATATGAATGGAA<br>CGACAATGAAATGTACCTGTTCCGATCATCTGTTGCATATGCTATGAGGCAGTACTTTTTAAAA<br>GTAAAAAATCAGATGATTCTTTTTGGGGAGGAGGATGTGCGAGTGGCTAATTTGAAACCAAGAA<br>TCTCCTTTAATTTCTTTGTCACTGCACCTAAAATGTGTCTGATATCATTCTAGAACTGAAGT<br>TGAAAAGGCCATCAGGATGTCCCGGAGCCGTATCAATGATGCTTTCCGTCTGAATGACAACAGC<br>CTAGAGTTTCTGGGGATACAGCCAACACTTGGACCTCCTAACCAGCCCCCTGTTTCC |
|--------------------------------------------------------------------------------------------------------------------------------------------------------------------------------------------------------------------------------------------------------------------------------------------------------------------------------------------------------------------------------------------------------------------------------------------------------------------------------------------------------------------------------------------------------------------------------------------------------------------------------------------------------------------------------------------------|
